1  
2 **Werner syndrome helicase is a selective vulnerability of microsatellite instability-**  
3 **high tumor cells**

4  
5  
6 Simone Lieb\*<sup>1</sup>, Silvia Blaha-Ostermann\*<sup>1</sup>, Elisabeth Kamper<sup>1</sup>, Katharina Ehrenhöfer-Wölfer<sup>1</sup>,  
7 Andreas Schlattl<sup>1</sup>, Andreas Wernitznig<sup>1</sup>, Jesse J. Lipp<sup>1</sup>, Kota Nagasaka<sup>2</sup>, Gerd Bader<sup>1</sup>, Ralph A.  
8 Neumüller<sup>1</sup>, Norbert Kraut<sup>1</sup>, Mark A. Pearson<sup>1</sup>, Mark Petronczki<sup>1\*#</sup> and Simon Wöhrle<sup>1\*#</sup>

9  
10  
11  
12  
13 <sup>1</sup>Boehringer Ingelheim RCV GmbH & Co KG, 1120 Vienna, Austria  
14 <sup>2</sup>Research Institute of Molecular Pathology, Vienna Biocenter, 1030 Vienna, Austria

15  
16 \*Equal contribution  
17 #Corresponding authors

18  
19 mark\_paul.petronczki@boehringer-ingelheim.com  
20 simon.woehrle@boehringer-ingelheim.com

21  
22  
23  
24  
25  
26  
27  
28  
29  
30  
31 Running Title: WRN dependency in MSI-H cancer  
32  
33 Keywords: WRN, helicase, mismatch repair, microsatellite instability, colorectal cancer

34 **Abstract**

35 Targeted cancer therapy is based on exploiting selective dependencies of tumor cells. By  
36 leveraging recent large-scale genomic profiling and functional screening of cancer cell lines we  
37 identified Werner syndrome helicase (WRN) as a novel specific vulnerability of microsatellite  
38 instability-high (MSI-H) cancer cells. MSI, caused by defective mismatch repair is frequently  
39 detected in human malignancies, in particular in colorectal, endometrial and gastric cancers. We  
40 demonstrate that WRN inactivation selectively impairs the viability of MSI-H but not microsatellite  
41 stable (MSS) colorectal and endometrial cancer cell lines. In MSI-H cells, WRN loss results in  
42 the emergence of chromosome breaks, chromatin bridges and micronuclei highlighting defective  
43 genome integrity. WRN variants harboring mutations abrogating the ATPase function of WRN  
44 helicase fail to rescue the viability phenotype of WRN-depleted MSI-H colorectal cells. Our study  
45 suggests that pharmacological inhibition of WRN helicase function might represent a novel  
46 opportunity to develop a targeted therapy for MSI-H cancers.

## 47 **Introduction**

48 Defects in components of the DNA repair machinery, such as *BRCA1/2* mutations or impaired  
49 DNA mismatch repair (MMR), are a common characteristic of tumor cells, accelerating the  
50 accumulation of DNA mutations or chromosomal aberrations that are required for neoplastic  
51 transformation (Kinzler and Vogelstein 1997). Plasticity of genome stability pathways permits  
52 tumor cells to tolerate the loss of individual DNA repair genes and leads to synthetic lethality (SL)  
53 upon targeting the compensating repair mechanism (Nickoloff, Jones et al. 2017). The first  
54 clinically approved drugs exploiting such a SL interaction are Poly(ADP-Ribose) Polymerase  
55 (PARP) inhibitors for therapy of BRCA1/BRCA2-deficient tumors (Kaufman, Shapira-Frommer et  
56 al. 2015, Lord and Ashworth 2017).

57 MMR deficiency is caused by inactivation of genes of the DNA repair machinery involved in the  
58 resolution of nucleotide base-base mismatches during DNA replication (Jiricny 2006). MMR  
59 defects lead to characteristic variations in the length of tandem nucleotide repeats across the  
60 genome, known as microsatellite instability (MSI) (Aaltonen, Peltomaki et al. 1993, Ionov,  
61 Peinado et al. 1993, Peltomaki, Lothe et al. 1993). Germline mutations in MMR genes, most  
62 commonly MLH1, MSH2, MSH6 and PMS2, are causative for Lynch syndrome, a cancer  
63 predisposition condition associated with increased lifetime risk to develop colorectal cancer  
64 (CRC) or other tumor types including endometrial and gastric carcinoma (Lynch and Krush 1971,  
65 Mecklin and Jarvinen 1991, Hampel, Frankel et al. 2005). In sporadic, nonhereditary CRC, MSI  
66 is frequently observed due to epigenetic silencing of MLH1 (Cunningham, Christensen et al.  
67 1998, Herman, Umar et al. 1998, Kuismanen, Holmberg et al. 2000). MSI-high (MSI-H) tumors  
68 display a hypermutator phenotype (Cancer Genome Atlas 2012), which entails increased  
69 immunogenicity, amendable to therapy with immune checkpoint inhibitors (Le, Uram et al. 2015).  
70 However, targeted therapies directly exploiting the MMR-deficient status of tumor cells do not  
71 exist.

72 Werner syndrome helicase (WRN) is a member of the RecQ DNA helicase subfamily (Yu,  
73 Oshima et al. 1996). RecQ helicases are involved in multiple DNA processing steps including  
74 DNA replication, double-strand break repair, transcription and telomere maintenance and are  
75 therefore considered to serve as “genome caretakers” (Chu and Hickson 2009). The critical  
76 function of this protein family in genome maintenance is underscored by the fact that defects in  
77 three of the five family members – WRN, Bloom Syndrome RecQ Like Helicase (BLM) and  
78 RecQ Like Helicase 4 (RECQL4) – give rise to human disease syndromes associated with  
79 developmental defects and cancer predisposition (Ellis, Groden et al. 1995, Yu, Oshima et al.

80 1996, Kitao, Shimamoto et al. 1999, Siitonen, Kopra et al. 2003, Van Maldergem, Siitonen et al.  
81 2006). Specifically, patients with Werner syndrome display a premature ageing phenotype  
82 including arteriosclerosis, type II diabetes and osteoporosis and are prone to develop tumors of  
83 mesenchymal origin, such as soft tissue sarcoma or osteosarcoma (Hickson 2003, Goto,  
84 Ishikawa et al. 2013). WRN is unique among RecQ family helicases in possessing 3'-5'  
85 exonuclease activity (Huang, Li et al. 1998, Kamath-Loeb, Shen et al. 1998, Shen, Gray et al.  
86 1998).

87 In contrast to the previously described tumor-suppressive role of WRN, we demonstrate in this  
88 study that WRN possesses a context-dependent critical pro-survival function for cancer cells. By  
89 leveraging a recently defined map of cancer cell specific vulnerabilities (McDonald, de Weck et  
90 al. 2017) and a comprehensive molecular characterization of cancer cell models (Barretina,  
91 Caponigro et al. 2012, Streit, Gratzl et al. 2018) we identify WRN helicase as a selective  
92 dependency in MSI-H cancer cell lines.

## 93 **Results**

### 94 **WRN dependency is associated with MSI-H status of cancer cells**

95 WRN was identified as a potential selective dependency in a subset of 398 cancer cell models in  
96 a recent pooled shRNA viability screen covering approximately 8000 genes (Project DRIVE)  
97 (McDonald, de Weck et al. 2017). A genomic or expression-based biomarker predictive for WRN  
98 dependency was unknown. Depletion of WRN exclusively affects viability of a subset of CRC,  
99 gastric and endometrial cancer cell models reflected by RSA (redundant siRNA activity)  
100 sensitivity scores  $\leq -3$ , indicative of cell essentiality (Figure 1A). Intriguingly, CRC, gastric and  
101 endometrial cancers are the three human malignancies with the highest frequency of MSI-H  
102 status (Cortes-Ciriano, Lee et al. 2017). This raised the possibility that WRN represents a  
103 selective dependency in MSI-H cell lines.

104 In order to explore this hypothesis we developed a Random Forest model using an MSI feature  
105 list defined by Boland and Goel (Boland and Goel 2010). This model classifies WRN sensitive  
106 and insensitive cell lines with an accuracy of 0.89 and a recall rate for sensitive lines of 0.69.  
107 Importantly, no true insensitive cell lines are classified as sensitive (Figure 1 – figure supplement  
108 1A). An analysis of variable importance revealed MLH1 expression as the feature most highly  
109 associated with the classification outcome, in line with the frequent inactivation of the MLH1  
110 gene in MSI-H CRC (Cunningham, Christensen et al. 1998, Herman, Umar et al. 1998,  
111 Kuismanen, Holmberg et al. 2000) (Figure 1 – figure supplement 1A). Consistently, WRN  
112 dependency anti-correlates with MLH1 mRNA expression levels among the cell models used in  
113 Project DRIVE (Figure 1 – figure supplement 1B;  $p=1.02 \times 10^{-4}$ , stratification of MLH1-low and -  
114 high expressing cell models according to median MLH1 expression [TPM 37.44]).

115 Next, we wanted to experimentally validate the MSI status in a select set of cell lines. To this end,  
116 we used a fluorescent PCR-based analysis of five mononucleotide microsatellite markers to  
117 determine the MSS/MSI-H status of a subset of CRC, gastric and endometrial cancer cell  
118 models (Table 1). In addition, we utilized a comprehensive MSS/MSI-H status annotation of  
119 CRC cell models reported by Medico and colleagues (Medico, Russo et al. 2015). Analysis of  
120 gene dependency and MSS/MSI-H status data revealed that WRN dependency was strongly  
121 associated with MSI-H status across CRC, gastric and endometrial models ( $p=6.11 \times 10^{-8}$ ). Of the  
122 19 cell lines classified as MSI-H, 15 cell lines (79%) were sensitive to WRN depletion using an  
123 RSA value of  $\leq -3$  to define WRN dependency (Figure 1B). In contrast, WRN is dispensable for  
124 viability in all MSS cell models (Figure 1B). Our analysis suggests that MSI-H status is a strong  
125 predictor for WRN sensitivity of cancer cells.

126 **WRN depletion by siRNA selectively impairs viability of MSI-H CRC and endometrial**  
127 **cancer cell lines**

128 To experimentally corroborate the WRN dependency of MSI-H cancer cells, we applied short-  
129 interfering RNA (siRNA)-mediated knock-down of WRN in a panel of three MSS (SK-CO-1,  
130 CaCo-2, SW480) and three MSI-H (HCT 116, RKO, SNU-C4) CRC cell lines. In agreement with  
131 the results from Project DRIVE, WRN depletion using a mixture of four siRNA duplexes (Pool) or  
132 an individual siRNA (#1) targeting WRN profoundly affected viability in MSI-H, but not in MSS  
133 CRC models (Figure 2A). In contrast, depletion of the known essential mitotic kinase, PLK1, had  
134 a detrimental effect on viability of both MSS and MSI-H cell lines. Efficient depletion of WRN  
135 protein following siRNA transfection was confirmed by immunoblotting (Figure 2A). The selective  
136 dependency on WRN was mirrored in colony formation assays with two MSS (LS1034, SK-CO-1)  
137 and two MSI-H cell lines (HCT 116, RKO) (Figure 2B). Likewise, we observed that WRN knock-  
138 down impaired viability of three MSI-H endometrial carcinoma cells lines (HEC-265, ISHIKAWA,  
139 HEC-6), but not the MSS cell line MFE-280 (Figure 2C). WRN mRNA levels were similarly  
140 reduced upon transfection of pooled or individual WRN-targeting siRNAs in all four endometrial  
141 carcinoma models (Figure 2 – figure supplement 1A).

142 Similar to MSS cancer models, non-transformed telomerase-immortalized human retinal pigment  
143 epithelial cells (hTERT RPE-1) did not display sensitivity to knock-down of WRN. It is noteworthy,  
144 that the depletion of the related RecQ helicase BLM significantly impaired viability of hTERT  
145 RPE-1, but not HCT 116 cells (Figure 2 – figure supplement 1B). To assess a potential  
146 mechanism to bypass WRN dependence in MSI-H cancer cells, we tested whether co-depletion  
147 of p53 and WRN in the *TP53*-wild-type MSI-H CRC line HCT 116 would reverse the sensitivity to  
148 WRN knock-down. However, WRN/p53 co-depletion exacerbated the reduction in viability  
149 compared to WRN knock-down alone (Figure 2 – figure supplement 1C). *TP53*-wild-type MSS  
150 CRC SK-CO-1 cells were affected neither by individual or dual knock-down of WRN and p53.  
151 Interestingly, in both cell lines we observed a slight elevation of p53 protein levels upon WRN  
152 depletion (Figure 2 – figure supplement 1C). These RNAi experiments demonstrate that  
153 depletion of WRN abrogates viability in MSI-H but not MSS or non-transformed cells.

154 **CRISPR/Cas9-mediated knock-out of WRN confirms the selective dependency of MSI-H**  
155 **CRC models on WRN**

156 We carried out CRISPR-Cas9 depletion assays in MSS and MSI-H CRC models to  
157 independently confirm the selective WRN dependencies observed in shRNA/siRNA studies. Cell  
158 lines were stably transduced with Cas9 followed by transduction of lentiviral particles co-

159 expressing GFP and single guide RNAs (sgRNAs) targeting WRN or the essential replication  
160 factor RPA3 (Figure 3A). To investigate the relevance of the different protein domains in WRN  
161 by CRISPR scanning (Shi, Wang et al. 2015), domain specific sgRNAs were used to target the  
162 exonuclease, helicase, RecQ helicase family DNA-binding (RQC) and Helicase and RNase D C-  
163 terminal (HRDC) domains and the C-terminal helix-turn-helix (HTH) motif. Negative selection of  
164 sgRNA expressing cells was monitored over 14 days via flow cytometry-based quantification of  
165 GFP expressing cells, and normalized to the effect of the RPA3 positive control sgRNA (Figure  
166 3B). We did not observe depletion of cells harboring WRN targeting sgRNAs in the MSS CRC  
167 cell line HT-29. In contrast, MSI-H HCT 116 cells expressing WRN sgRNAs depleted to a similar  
168 level as observed for the RPA3 positive control. SgRNA directed against the exonuclease,  
169 helicase and RQC domains were most effective, implying a functional or structural requirement  
170 of both these domains in the context of WRN dependency. Interestingly, strong depletion effects  
171 were also observed for sgRNAs targeting the C-terminal HTH motif (Figure 3B). A similar WRN  
172 sgRNA depletion pattern was observed in the MSI-H CRC cell line RKO, while we found far less  
173 pronounced depletion effects in the MSS CRC model SK-CO-1 (Figure 3 – figure supplement 1).  
174 In agreement with the RNAi studies, our CRISPR/Cas9 experiments suggest that WRN provides  
175 an essential gene function in two MSI-H CRC cell lines but not in two MSS CRC lines.

#### 176 **WRN dependency in MSI-H CRC is linked to its helicase function**

177 To further dissect the relevance of WRN exonuclease and helicase function in WRN-dependent  
178 cell models, we generated FLAG-tagged, siRNA-resistant WRN (WRNr) expression constructs  
179 harboring loss-of-function mutations within the exonuclease- (E84A, Nuclease-dead) and  
180 helicase-domain (K577M, ATPase-dead), or both domains (E84A/K577M, Double-mutant) (Gray,  
181 Shen et al. 1997, Huang, Li et al. 1998) (Figure 4A). Wild-type and mutant forms of WRNr were  
182 transduced in HCT 116 cells and monoclonal lines with matched stable WRNr expression were  
183 generated. Expression and nuclear accumulation of transgenic WRNr variants among the cell  
184 lines was confirmed using immunofluorescence analysis (Figure 4B). Immunoblotting revealed  
185 that transgenic WRNr wild-type as well as the mutant WRN proteins were expressed at levels  
186 higher than the endogenous WRN counterpart (Figure 4B). Two wild-type WRNr expressing  
187 clones were selected based on the respective high and low expression of the transgene in order  
188 to cover the range of mutant WRNr variant expression observed in the selected panel of clones.  
189 As expected, viability of empty vector control-transduced cells was strongly reduced upon  
190 depletion of WRN (Figure 4C). Importantly, both the high and low expression level of wild-type  
191 WRNr was sufficient to render HCT 116 cells inert to knock-down of endogenous WRN (Figure  
192 4C). This demonstrates the on-target effect of the WRN siRNA duplex and indicates that the

193 transgene-mediated rescue of WRN function is not protein level sensitive. Exogenous  
194 expression of the nuclease-dead form of WRN almost completely rescued the effect of  
195 endogenous WRN depletion. In stark contrast, although expressed at similar or higher levels  
196 than WRN wild-type, both the ATPase-dead and double-mutant form of WRN were unable to  
197 restore viability following depletion of endogenous WRN (Figure 4C). Similarly, in RKO cells  
198 expressing WRN variants, we also observed a stronger dependency on WRN helicase function  
199 compared to exonuclease activity upon knock-down of endogenous WRN (Figure 4 – figure  
200 supplement 1). These results indicate that the ATPase activity of WRN and possibly its helicase  
201 function are crucial for the survival of MSI-H CRC cells.

### 202 **Loss of WRN causes mitotic defects and nuclear abnormalities in MSI-H cells**

203 In order to investigate the cellular basis for the viability reduction of MSI-H cancer cells upon  
204 WRN depletion, we monitored the consequences of WRN loss-of-function using  
205 immunofluorescence analysis of the nuclear membrane protein LAP2 $\beta$  and Hoechst DNA  
206 staining in MSS and MSI-H CRC cell lines. SW480 did not display any phenotypic differences  
207 upon transfection with NTC and WRN-targeting siRNAs (Figure 5A). Strikingly, in HCT 116 and  
208 RKO cells we observed formation of chromatin bridges and micronuclei upon WRN knock-down,  
209 both potential consequences of failed sister genome partitioning during mitosis (Figure 5A).  
210 Enlarged nuclei, indicative of failed mitosis, were additionally observed upon WRN knock-down  
211 in HCT 116 cells. Quantification of the frequency of chromatin bridges and micronuclei revealed  
212 that WRN depletion did not affect baseline levels of these aberrant nuclear morphologies in the  
213 MSS CRC cancer models SK-CO-1 and SW480, while the frequency of both chromatin bridges  
214 and micronuclei was strongly increased upon WRN knock-down in the MSI-H CRC cell lines  
215 HCT 116 and RKO (Figures 5B and C). In non-transformed hTERT RPE-1 cells, WRN depletion  
216 led to a slight increase of chromatin bridge and micronucleus formation, although far less  
217 pronounced compared to the MSI-H CRC models (Figures 5B and C). Supportive of the  
218 immunofluorescence studies, live cell imaging revealed a strong increase of the incidence of  
219 lagging chromosomes and chromosome bridges during mitosis in WRN depleted MSI-H CRC  
220 cell lines HCT 116 and RKO, but not MSS SW480 cells (Figure 6). We conclude that WRN  
221 depletion in MSI-H cells results in nuclear morphology and integrity aberrations that are  
222 manifested during cell division. The correlation of these defects with the observed cell viability  
223 reduction in MSI-H models suggests that nuclear abnormalities are causally linked to the anti-  
224 proliferative effect of WRN loss.

### 225 **Structural chromosome aberrations in MSI-H cells after WRN loss-of-function**



226 The observed nuclear integrity and mitotic defects caused by WRN depletion in MSI-H cells  
227 could be the consequence of preceding genome maintenance aberrations. This hypothesis is  
228 reinforced by the important role of RECQ family helicases, including WRN, in genome integrity  
229 (Chu and Hickson 2009). To interrogate genome integrity, we performed mitotic chromosome  
230 spread analysis in MSI-H, MSS and non-transformed cells after depletion of WRN. To overcome  
231 the low abundance of mitotic cells in WRN-depleted MSI-H cell lines, caffeine was added to  
232 cultured cells to bypass the G2/M checkpoint. Strikingly, WRN loss elicited structural  
233 chromosome aberrations, such as chromosome breaks and non-homologous radial formations,  
234 in the MSI-H CRC cell lines HCT 116 and RKO (Figure 7A). Quantification of the number of  
235 chromatin breaks per nuclei demonstrated a strong increase in the fraction of cells harboring 1-5  
236 or >5 chromosome breaks per nuclei in the two MSI-H CRC models upon WRN depletion  
237 (Figure 7B). In the MSS CRC model SW480 and hTERT RPE1 non-transformed cells only a  
238 minor increase of nuclei with chromosome breaks was detected (Figure 7B). These data suggest  
239 that WRN helicase is essential for maintaining genome integrity in MSI-H cells by preventing  
240 chromosome breaks and erroneous chromosome fusions. The observed mitotic chromosome  
241 aberrations in WRN-depleted MSI cells can also explain the aforementioned nuclear morphology  
242 and mitotic defects, including micronuclei, lagging chromosomes and chromatin bridges. The  
243 correlation of chromosome aberrations and nuclear abnormalities with MSI-H status following  
244 loss of WRN function suggests that genome integrity defects are responsible for the profound  
245 reduction in viability of MSI-H cancer cells.

## 246 **Discussion**

247 Treatment paradigms for MSI-H tumors have recently shifted with the approval of the immune  
248 checkpoint agents pembrolizumab, nivolumab and ipilimumab, targeting programmed cell death  
249 1 (PD-1) and cytotoxic T-lymphocyte-associated Protein 4 (CTLA-4) in this patient segment (Le,  
250 Uram et al. 2015, Le, Durham et al. 2017, Overman, Lonardi et al. 2018). Pembrolizumab  
251 constitutes the first cancer therapy approval based on a patient selection biomarker irrespective  
252 of the tumor type, highlighting MSI-H status as a therapeutically trackable and clinically  
253 implemented feature of tumor cells (Goswami and Sharma 2017). While responses to immune  
254 checkpoint blockade in MSI-H cancer are often durable, intrinsic and acquired resistance to  
255 immunotherapy represents a continuous medical need in MSI-H cancer.

256 The results of this study uncover a novel vulnerability of MSI-H tumor cell models and indicate  
257 that pharmacological inhibition of WRN ATPase/helicase function might serve as an attractive  
258 novel targeted therapeutic strategy in MSI-H cancer. Our data suggest that similar to the tumor  
259 agnostic activity of checkpoint blockade, MMR deficiency represents a genetic determinant for  
260 WRN dependency regardless of tumor type. Upon WRN loss-of-function we observe a strong  
261 and rapid decrease in viability of MSI-H cell models that is accompanied by nuclear  
262 abnormalities and cell division defects. In particular, we find that WRN depleted MSI-H cancer  
263 cells display chromosome breaks, chromatin bridges and micronuclei indicative of genome  
264 instability that is highlighted during cell division. The occurrence of these defects in MSI-H but  
265 not MSS cells upon WRN inactivation suggests that these aberrations might be causally linked  
266 to the selective reduction in viability in MSI-H cells. While rescue studies using WRN variants  
267 clearly indicate WRN helicase function as the critical enzymatic activity in MSI-H cell models,  
268 CRISPR domain scanning suggests a structural requirement of the exonuclease domain and the  
269 HTH loop of WRN.

270 WRN is a member of the RecQ helicase family which fulfils pleiotropic functions in DNA repair  
271 (Chu and Hickson 2009). MMR activity is required for activation of the G2/M checkpoint in  
272 response to DNA damage prior to entry into mitosis (O'Brien and Brown 2006). WRN function in  
273 MSI-H cells might therefore be critical for the resolution of DNA damage events and to prevent  
274 premature entry into mitosis. Of note, cell lines derived from Werner syndrome patients display  
275 defective mitotic recombination and are susceptible to genome instability (Prince, Emond et al.  
276 2001). However, in MSS cancer and non-transformed cells WRN depletion had no or very mild  
277 effects on viability, suggesting that pharmacological inhibition of WRN might allow for an MSI-H  
278 cancer-directed therapy that spares normal cells and tissues.

279 The chromosome breaks and radial chromosomes observed in MSI-H cells upon WRN depletion  
280 indicate the generation and/or persistence of DNA double strand breaks. Future research is  
281 required to dissect the molecular basis for this effect. It is conceivable that WRN is required to  
282 process and resolve DNA repair or replication intermediates that arise in MMR-deficient cells or  
283 that MMR is required to cope with intermediates emerging upon compromised WRN function.  
284 The identification of the molecular basis of the WRN-MSI-H relationship will also help to  
285 understand why some rare outlier MSI-H cell lines do not respond to WRN inactivation.

286 Werner syndrome patients show an increased lifetime risk to develop tumors, pointing to a  
287 tumor-suppressive function of WRN (Goto, Ishikawa et al. 2013). Interestingly, homozygous  
288 *Wrn*-null mice display no overt phenotype and do not recapitulate the premature ageing or  
289 cancer predisposition conditions of Werner syndrome, unless crossed into a *Terc*-null  
290 background (Lebel and Leder 1998, Lombard, Beard et al. 2000, Chang, Multani et al. 2004).  
291 Mutations in Werner syndrome are almost exclusively truncating nonsense, splicing or frameshift  
292 mutations affecting WRN nuclear localization, suggesting that concomitant loss of WRN helicase  
293 and exonuclease function might be required for the onset of Werner syndrome (Matsumoto,  
294 Shimamoto et al. 1997, Huang, Lee et al. 2006). This indicates that inhibition of WRN helicase  
295 function might have a therapeutic index for the treatment of MSI-H cancer without inducing  
296 Werner syndrome related phenotypes.

297 Our study highlights the power of combining deep functional genomic screen data with tumor cell  
298 line profiling to identify new targets with an associated predictive biomarker in oncology. Given  
299 the possibility to develop potent and selective small molecule inhibitors of WRN helicase  
300 (Rosenthal, Dexheimer et al. 2010), our findings outline a novel strategy for the treatment of a  
301 clinically defined subset of patients harboring MSI-H/MMR-deficient tumors. Since genome  
302 instability can elicit cytoplasmic nucleic acid sensor pathways and innate immune responses  
303 (Mackenzie, Carroll et al. 2017), the induction of cancer cell selective nuclear aberrations by  
304 WRN inactivation could provide a synergistic combination option with the approved  
305 immunotherapy agents for the benefit of MSI-H cancer patients.

## 306 **Materials and Methods**

### 307 **Random Forrest model**

308 To explore the hypothesis that WRN sensitivity is associated with MSI, we employed an  
309 exploratory machine learning approach (Qi 2012). We first divided the DRIVE WRN cell line  
310 sensitivity data (McDonald, de Weck et al. 2017) into four distinct groups, using a k-means  
311 clustering algorithm. We chose four clusters to model insensitive (cluster 1), moderate  
312 insensitive (cluster 2), moderate sensitive (cluster 3) and sensitive (cluster 4) cell lines. We  
313 subsequently denoted clusters 1 and 2 as insensitive and clusters 3 and 4 as sensitive and  
314 chose an RSA score  $< -1.37$  (maximum value of cluster 3) as a cutoff between sensitive and  
315 insensitive lines. Only a small fraction of cell lines, 30 out of 371 cell lines (8%), is sensitive in  
316 the entire data set, suggesting a pronounced class imbalance between sensitive and insensitive  
317 cell lines. To address this class imbalance, we focused our subsequent analysis on cell lines  
318 originating from CRC, as i) most sensitive cell lines are from this indication and ii) MSI has been  
319 extensively characterized in this indication (Boland and Goel 2010, Medico, Russo et al. 2015).  
320 36% (13 out of 36) of colon cancer cell lines are sensitive to WRN loss of function according to  
321 our k-means clustering based approach.

322 We next assembled a MSI feature list. We used cell line gene expression and mutation data for  
323 the cell lines from a set of genes, i) involved in MMR (EXO1, MLH1, MLH3, MSH2, MSH3,  
324 MSH6) and ii) genetic target genes of MSI in CRC (Boland and Goel 2010). We next trained a  
325 Random Forest model based on 50% of the data. On the full dataset, the model classifies WRN  
326 sensitive and insensitive cell lines with an accuracy of 0.89 and a recall rate for sensitive lines of  
327 0.69.

### 328 **MSI Analysis**

329 Genomic DNA was isolated using QIAamp®DNA mini kit (Qiagen, Hilden, Germany). Per  
330 reaction 2 ng of genomic DNA was used for fluorescent PCR-based analysis of the  
331 mononucleotide microsatellite marker length using the Promega MSI Analysis System, Version  
332 1.2 kit. Microsatellite fragment length was analyzed using capillary electrophoreses (Applied  
333 Biosystems 3130xl Genetic Analyzer, 16-capillary electrophoresis instrument) and evaluated  
334 with GeneMapper Software 5 (Applied Biosystems).

### 335 **Cell culture and lentiviral transduction**

336 HCT 116 cells were cultured in McCoy's 5A medium (GIBCO, 36600-021) with glutamax  
337 supplemented with 10% fetal calf serum (FCS), hTERT RPE-1 cells were cultured in DMEM:F12

338 (ATCC: 30–2006) supplemented with 10% FCS and 0.01 mg/ml Hygromycin B. RKO, SW480,  
339 CaCo-2 and SK-CO-1 cells were cultured in EMEM (SIGMA, M5650) with glutamax  
340 supplemented with 10% FCS and Na-Pyruvate. SNU-C4 cells were cultured in RPMI1640  
341 medium (ATCC #30-2001) with glutamax, supplemented with 10% FCS, 25 mM HEPES and 25  
342 mM NaHCO<sub>3</sub>. LS1034 cells were cultured in RPMI-1640 (ATCC #30-2001) supplemented with  
343 10% FCS. MFE-280 cells were cultured in 40% RPMI 1640 (GIBCO), 40% DMEM (SIGMA,  
344 D6429) supplemented with 20% FCS and 1X insulin-transferin-sodium selenite (GIBCO, 41400-  
345 045). HEC-265 cells were cultured in EMEM (SIGMA, M5650) with glutamax supplemented with  
346 15% FCS. ISHIKAWA cells were cultured in EMEM (SIGMA, M5650) w/glutamax medium  
347 supplemented with 5% FCS and NEAA. HEC-6 cells were cultured in EMEM (SIGMA, M5650)  
348 with glutamax supplemented with 15% FCS and NEAA and Na-Pyruvate. HT-29\_CRISPR-Cas9  
349 cells were cultured in McCoy's 5A (GIBCO, 36600-021) with glutamax supplemented with 10%  
350 FCS and 10 µg/ml Blasticidin (Invitrogen, R210-01). HCT 116\_CRISPR-Cas9 cells were  
351 cultured like the parental cell line supplemented with 2 µg/ml Puromycin. All supplements were  
352 obtained from GIBCO, FCS (SH30071.03) from GE Healthcare Life Sciences and Puromycin  
353 from SIGMA (P9620). Lentiviral particles were produced using the Lenti-X Single Shot system  
354 (Clontech, Mountain View, CA, US). Following lentiviral infection, stably transduced pools were  
355 generated using Puromycin selection (HCT 116: 2 µg/ml, RKO: 0.5 µg/ml, SK-CO-1: 1 µg/ml) or  
356 Blasticidin (HT-29: 10 µg/ml). Sources, MSI status and authentication information (STR  
357 fingerprinting at Eurofins Genomics, Germany) of cell lines used in this study are provided in  
358 Table 2. All cell lines were tested negatively for mycoplasma contamination and have been  
359 authenticated by STR fingerprinting.

### 360 **siRNA transfection and cell viability**

361 For knock-down experiments, cells were transfected with ON-TARGETplus SMARTpool siRNA  
362 duplexes (Dharmacon, Lafayette, CO, US) using Lipofectamine RNAiMAX reagent according to  
363 the manufacturer's instructions (Invitrogen, Waltham, MA, US). For WRN knock-down,  
364 additionally an individual siRNA was used (J-010378-05). Chromosome spreads, immunoblotting,  
365 immunofluorescence and live cell imaging experiments were performed using a final siRNA  
366 concentration of 20 nM. Cell viability and crystal violet staining assays were performed using 10  
367 nM siRNA. Viability was determined using CellTiter-Glo (Promega, Madison, WI, US) and by  
368 staining with crystal violet (Sigma-Aldrich, St. Louis, MO, US; HT901). For co-depletion of p53  
369 and WRN 10 nM of the respective siRNA duplexes each were used for immunoblot and viability  
370 assay.

371

## 372 **Cell extracts for immunoblotting**

373 Cell pellets were resuspended in extraction buffer (50 mM Tris Cl pH 8.0, 150 mM NaCl, 1%  
374 Nonidet P-40 supplemented with Complete protease inhibitor mix (Roche, Switzerland) and  
375 Phosphatase inhibitor cocktails (Sigma-Aldrich, St. Louis, MO, US; P5726 and P0044).

## 376 **Antibodies**

377 The following antibodies were used: WRN (8H3) mouse mAb (Cell signaling #4666, 1/1000  
378 dilution), mouse anti-GAPDH (Abcam, ab8245, 1/30000 dilution), mouse anti-FLAG (SIGMA,  
379 F1804, 1/1000 [immunoblot] or 1/500 [immunofluorescence] dilution), mouse anti-LAP2 $\beta$  (BD  
380 (Transduction Laboratories #611000, 1/100 dilution), mouse anti-p53 (Calbiochem, OP43,  
381 1/1000 dilution) and secondary rabbit (Dako P0448, 1/1000 dilution), mouse anti-IgG-HRP(Dako  
382 P0161, 1/1000 dilution) and mouse Alexa Fluor 488 (Molecular Probes, Eugene, OR, US,  
383 1/1000 dilution).

## 384 **Quantitative reverse transcription PCR (qRT-PCR)**

385 RNA was isolated 72 h post-transfection and reversely transcribed using SuperScript™ VILO™  
386 kit (Thermo Scientific). All qPCR analyses were performed with the QuantiTect® Multiplex PCR  
387 kit (Qiagen, Hilden, Germany) on a StepOne Real-Time PCR Sytem™ (Applied Biosystems) with  
388 a total of 45 cycles. Constitutive maintenance gene 18S rRNA (Applied Biosystems, Quencher  
389 VIC®/MGB, 4319413E ) and human WRN (Applied Biosystems, Quencher FAM®/MGB-NFQ,  
390 4331182) TaqMan probes were used. WRN expression was normalized to 18S rRNA expression  
391 levels and is indicated relative to the NTC control.

## 392 **CRISPR depletion assays**

393 Stable Cas9 expressing cell lines, using either Blasticidin or Puromycin as selection markers,  
394 were transduced with vectors encoding GFP and sgRNAs targeting different domains of WRN  
395 (Table 3). On day 3 post-transfection the fraction of GFP positive cells, measured via flow  
396 cytometry analysis, was set to 100%. All values were normalized to the control RPA3\_1.3 for  
397 relative depletion ratio.

## 398 **cDNA transgene vectors**

399 pLVX-WRN-3xFLAG-IRES-Puro, pLVX-WRN-3xFLAG-IRES-Puro K577M, pLVX-WRN-3xFLAG-  
400 IRES-Puro E84A and pLVX-WRN-3xFLAG-IRES-Puro E84A\_K577M for siRNA-resistant  
401 transgene expression were generated by gene synthesis (GenScript, China) based on the WRN  
402 cDNA sequence NCBI NM\_000553.5 followed by cloning into the parental pLVX vector

403 (Clontech, Mountain View, CA, US). Codon optimization changes were introduced into WRN  
404 coding sequences to render the transgenes siRNA-resistant.

#### 405 **Immunofluorescence, chromosome spreads and live cell imaging**

406 For immunofluorescence, 72 h post siRNA transfection cells were fixed with 4%  
407 paraformaldehyde for 15 min, permeabilized with 0.2% Triton X-100 in PBS for 10 min and  
408 blocked with 3% BSA in PBS containing 0.01% Triton X-100. Cells were incubated with primary  
409 (LAP2 $\beta$ ) and secondary antibody (Alexa 488, Molecular Probes, Eugene, OR, US), DNA was  
410 counterstained with Hoechst 33342 (Molecular Probes, Eugene, OR, US; H3570). Coverslips  
411 and chambers were mounted with ProLong Gold (Molecular Probes, Eugene, OR, US). Images  
412 were taken with an Axio Plan2/AxioCam microscope and processed with MrC5/Axiovision  
413 software (Zeiss, Germany). For chromosome spread analysis, Nocodazole (1.5  $\mu$ M final  
414 concentration) and 2 mM Caffeine was added to the medium for 6 h. Cells were harvested and  
415 hypotonically swollen in 40% medium/60% tap water for 5 min at room temperature. Cells were  
416 fixed with freshly made Carnoy's solution (75% methanol, 25% acetic acid), and the fixative was  
417 changed three times. For spreading, cells in Carnoy's solution were dropped onto glass slides  
418 and dried. Slides were stained with 5% Giemsa (Merck) for 4 min, washed briefly in tap water  
419 and air dried. For chromosome spread analysis two independent slides were scored blindly for  
420 each condition. Live cell imaging was performed using Spinning Disk Confocal UltraView Vox  
421 Axio Observer equipped with Plan apochromat 20x/0.8 objective (Zeiss) and an electron-  
422 multiplying charge-coupled device 9100-13 camera (Hamamatsu Photonics). The microscope  
423 was controlled using Volocity software (Perkin-Elmer). DNA was counterstained with 100 nM  
424 SiR-Hoechst 3 h before the start of imaging. At 24 h post siRNA transfection cell nuclei were  
425 imaged in 2 z slice sections spaced 6  $\mu$ m every 6 min for 48 h. For the imaging, cells were  
426 seeded into glass bottom 24 well SensoPlate (Greiner) with imaging medium (phenol red free  
427 DMEM supplemented with 10% [vol/vol] FCS, L-glutamine 2 mM and 1% [vol/vol] penicillin-  
428 streptomycin). During live cell imaging, cells were maintained at 37°C in a humidified 5% CO<sub>2</sub>  
429 atmosphere.

430 **Acknowledgements**

431 We would like to thank Susanne Stockinger, Vanessa Rössler, Jodie Grant und Christoph Reiser  
432 (all Boehringer Ingelheim RCV GmbH) for generation of Cas9-expressing cell lines. The  
433 Research Institute of Molecular Pathology (IMP) is supported by Boehringer Ingelheim. We  
434 thank Stephen West (The Francis Crick Institute, UK) for helpful suggestions and advice. We are  
435 grateful to Jan-Michael Peters (IMP) for support of this study and access to live cell imaging  
436 technology. KN is supported by an EMBO Long Term Fellowship (ALTF 1335-2016) and a HFSP  
437 fellowship (LT001527/2017).

438 **Author contributions**

439 SL, SBO, EK, KEW and KN performed the experiments. GB designed exonuclease- and  
440 ATPase-dead WRN expression constructs. AS, AW, J JL and RAN performed bioinformatic  
441 analyses. MAP and NK supervised the study. MP and SW wrote the manuscript with support  
442 from SL, SBO, EK and RAN. MP and SW designed and supervised the experiments and devised  
443 the main conceptual ideas.

444 **Conflict of interest**

445 SL, SBO, EK, KEW, AS, AW, J JL, GB, RAN, NK, MAP, MP and SW are full-time employees of  
446 Boehringer Ingelheim RCV GmbH & Co KG, Vienna, Austria. KN declares that no competing  
447 interests exist.



## 448 **References**

- 449 Aaltonen, L. A., P. Peltomaki, F. S. Leach, P. Sistonen, L. Pylkkanen, J. P. Mecklin, H. Jarvinen,  
450 S. M. Powell, J. Jen, S. R. Hamilton and et al. (1993). "Clues to the pathogenesis of familial  
451 colorectal cancer." Science **260**(5109): 812-816.
- 452 Barretina, J., G. Caponigro, N. Stransky, K. Venkatesan, A. A. Margolin, S. Kim, C. J. Wilson, J.  
453 Lehar, G. V. Kryukov, D. Sonkin, A. Reddy, M. Liu, L. Murray, M. F. Berger, J. E. Monahan, P.  
454 Morais, J. Meltzer, A. Korejwa, J. Jane-Valbuena, F. A. Mapa, J. Thibault, E. Bric-Furlong, P.  
455 Raman, A. Shipway, I. H. Engels, J. Cheng, G. K. Yu, J. Yu, P. Aspesi, Jr., M. de Silva, K.  
456 Jagtap, M. D. Jones, L. Wang, C. Hatton, E. Palescandolo, S. Gupta, S. Mahan, C. Sougnez, R.  
457 C. Onofrio, T. Liefeld, L. MacConaill, W. Winckler, M. Reich, N. Li, J. P. Mesirov, S. B. Gabriel, G.  
458 Getz, K. Ardlie, V. Chan, V. E. Myer, B. L. Weber, J. Porter, M. Warmuth, P. Finan, J. L. Harris,  
459 M. Meyerson, T. R. Golub, M. P. Morrissey, W. R. Sellers, R. Schlegel and L. A. Garraway  
460 (2012). "The Cancer Cell Line Encyclopedia enables predictive modelling of anticancer drug  
461 sensitivity." Nature **483**(7391): 603-607.
- 462 Boland, C. R. and A. Goel (2010). "Microsatellite instability in colorectal cancer."  
463 Gastroenterology **138**(6): 2073-2087 e2073.
- 464 Cancer Genome Atlas, N. (2012). "Comprehensive molecular characterization of human colon  
465 and rectal cancer." Nature **487**(7407): 330-337.
- 466 Chang, S., A. S. Multani, N. G. Cabrera, M. L. Naylor, P. Laud, D. Lombard, S. Pathak, L.  
467 Guarente and R. A. DePinho (2004). "Essential role of limiting telomeres in the pathogenesis of  
468 Werner syndrome." Nat Genet **36**(8): 877-882.
- 469 Chu, W. K. and I. D. Hickson (2009). "RecQ helicases: multifunctional genome caretakers." Nat  
470 Rev Cancer **9**(9): 644-654.
- 471 Cortes-Ciriano, I., S. Lee, W. Y. Park, T. M. Kim and P. J. Park (2017). "A molecular portrait of  
472 microsatellite instability across multiple cancers." Nat Commun **8**: 15180.
- 473 Cunningham, J. M., E. R. Christensen, D. J. Tester, C. Y. Kim, P. C. Roche, L. J. Burgart and S.  
474 N. Thibodeau (1998). "Hypermethylation of the hMLH1 promoter in colon cancer with  
475 microsatellite instability." Cancer Res **58**(15): 3455-3460.
- 476 Ellis, N. A., J. Groden, T. Z. Ye, J. Straughen, D. J. Lennon, S. Ciocci, M. Proytcheva and J.  
477 German (1995). "The Bloom's syndrome gene product is homologous to RecQ helicases." Cell  
478 **83**(4): 655-666.
- 479 Goswami, S. and P. Sharma (2017). "Genetic biomarker for cancer immunotherapy." Science  
480 **357**(6349): 358.
- 481 Goto, M., Y. Ishikawa, M. Sugimoto and Y. Furuichi (2013). "Werner syndrome: a changing  
482 pattern of clinical manifestations in Japan (1917~2008)." Biosci Trends **7**(1): 13-22.
- 483 Gray, M. D., J. C. Shen, A. S. Kamath-Loeb, A. Blank, B. L. Sopher, G. M. Martin, J. Oshima  
484 and L. A. Loeb (1997). "The Werner syndrome protein is a DNA helicase." Nat Genet **17**(1): 100-  
485 103.

- 486 Hampel, H., W. L. Frankel, E. Martin, M. Arnold, K. Khanduja, P. Kuebler, H. Nakagawa, K.  
487 Sotamaa, T. W. Prior, J. Westman, J. Panescu, D. Fix, J. Lockman, I. Comeras and A. de la  
488 Chapelle (2005). "Screening for the Lynch syndrome (hereditary nonpolyposis colorectal  
489 cancer)." N Engl J Med **352**(18): 1851-1860.
- 490 Herman, J. G., A. Umar, K. Polyak, J. R. Graff, N. Ahuja, J. P. Issa, S. Markowitz, J. K. Willson,  
491 S. R. Hamilton, K. W. Kinzler, M. F. Kane, R. D. Kolodner, B. Vogelstein, T. A. Kunkel and S. B.  
492 Baylin (1998). "Incidence and functional consequences of hMLH1 promoter hypermethylation in  
493 colorectal carcinoma." Proc Natl Acad Sci U S A **95**(12): 6870-6875.
- 494 Hickson, I. D. (2003). "RecQ helicases: caretakers of the genome." Nat Rev Cancer **3**(3): 169-  
495 178.
- 496 Huang, S., L. Lee, N. B. Hanson, C. Lenaerts, H. Hoehn, M. Poot, C. D. Rubin, D. F. Chen, C. C.  
497 Yang, H. Juch, T. Dorn, R. Spiegel, E. A. Oral, M. Abid, C. Battisti, E. Lucci-Cordisco, G. Neri, E.  
498 H. Steed, A. Kidd, W. Isley, D. Showalter, J. L. Vittone, A. Konstantinow, J. Ring, P. Meyer, S. L.  
499 Wenger, A. von Herbay, U. Wollina, M. Schuelke, C. R. Huizenga, D. F. Leistriz, G. M. Martin, I.  
500 S. Mian and J. Oshima (2006). "The spectrum of WRN mutations in Werner syndrome patients."  
501 Hum Mutat **27**(6): 558-567.
- 502 Huang, S., B. Li, M. D. Gray, J. Oshima, I. S. Mian and J. Campisi (1998). "The premature  
503 ageing syndrome protein, WRN, is a 3'-->5' exonuclease." Nat Genet **20**(2): 114-116.
- 504 Ionov, Y., M. A. Peinado, S. Malkhosyan, D. Shibata and M. Perucho (1993). "Ubiquitous  
505 somatic mutations in simple repeated sequences reveal a new mechanism for colonic  
506 carcinogenesis." Nature **363**(6429): 558-561.
- 507 Jiricny, J. (2006). "The multifaceted mismatch-repair system." Nat Rev Mol Cell Biol **7**(5): 335-  
508 346.
- 509 Kamath-Loeb, A. S., J. C. Shen, L. A. Loeb and M. Fry (1998). "Werner syndrome protein. II.  
510 Characterization of the integral 3' --> 5' DNA exonuclease." J Biol Chem **273**(51): 34145-34150.
- 511 Kaufman, B., R. Shapira-Frommer, R. K. Schmutzler, M. W. Audeh, M. Friedlander, J. Balmana,  
512 G. Mitchell, G. Fried, S. M. Stemmer, A. Hubert, O. Rosengarten, M. Steiner, N. Loman, K.  
513 Bowen, A. Fielding and S. M. Domchek (2015). "Olaparib monotherapy in patients with  
514 advanced cancer and a germline BRCA1/2 mutation." J Clin Oncol **33**(3): 244-250.
- 515 Kinzler, K. W. and B. Vogelstein (1997). "Cancer-susceptibility genes. Gatekeepers and  
516 caretakers." Nature **386**(6627): 761, 763.
- 517 Kitao, S., A. Shimamoto, M. Goto, R. W. Miller, W. A. Smithson, N. M. Lindor and Y. Furuichi  
518 (1999). "Mutations in RECQL4 cause a subset of cases of Rothmund-Thomson syndrome." Nat  
519 Genet **22**(1): 82-84.
- 520 Korch, C., M. A. Spillman, T. A. Jackson, B. M. Jacobsen, S. K. Murphy, B. A. Lessey, V. C.  
521 Jordan and A. P. Bradford (2012). "DNA profiling analysis of endometrial and ovarian cell lines  
522 reveals misidentification, redundancy and contamination." Gynecol Oncol **127**(1): 241-248.
- 523 Kuismanen, S. A., M. T. Holmberg, R. Salovaara, A. de la Chapelle and P. Peltomaki (2000).  
524 "Genetic and epigenetic modification of MLH1 accounts for a major share of microsatellite-  
525 unstable colorectal cancers." Am J Pathol **156**(5): 1773-1779.

- 526 Le, D. T., J. N. Durham, K. N. Smith, H. Wang, B. R. Bartlett, L. K. Aulakh, S. Lu, H. Kemberling,  
527 C. Wilt, B. S. Lubber, F. Wong, N. S. Azad, A. A. Rucki, D. Laheru, R. Donehower, A. Zaheer, G.  
528 A. Fisher, T. S. Crocenzi, J. J. Lee, T. F. Greten, A. G. Duffy, K. K. Ciombor, A. D. Eyring, B. H.  
529 Lam, A. Joe, S. P. Kang, M. Holdhoff, L. Danilova, L. Cope, C. Meyer, S. Zhou, R. M. Goldberg,  
530 D. K. Armstrong, K. M. Bever, A. N. Fader, J. Taube, F. Housseau, D. Spetzler, N. Xiao, D. M.  
531 Pardoll, N. Papadopoulos, K. W. Kinzler, J. R. Eshleman, B. Vogelstein, R. A. Anders and L. A.  
532 Diaz, Jr. (2017). "Mismatch repair deficiency predicts response of solid tumors to PD-1  
533 blockade." Science **357**(6349): 409-413.
- 534 Le, D. T., J. N. Uram, H. Wang, B. R. Bartlett, H. Kemberling, A. D. Eyring, A. D. Skora, B. S.  
535 Lubber, N. S. Azad, D. Laheru, B. Biedrzycki, R. C. Donehower, A. Zaheer, G. A. Fisher, T. S.  
536 Crocenzi, J. J. Lee, S. M. Duffy, R. M. Goldberg, A. de la Chapelle, M. Koshiji, F. Bhajee, T.  
537 Huebner, R. H. Hruban, L. D. Wood, N. Cuka, D. M. Pardoll, N. Papadopoulos, K. W. Kinzler, S.  
538 Zhou, T. C. Cornish, J. M. Taube, R. A. Anders, J. R. Eshleman, B. Vogelstein and L. A. Diaz, Jr.  
539 (2015). "PD-1 Blockade in Tumors with Mismatch-Repair Deficiency." N Engl J Med **372**(26):  
540 2509-2520.
- 541 Lebel, M. and P. Leder (1998). "A deletion within the murine Werner syndrome helicase induces  
542 sensitivity to inhibitors of topoisomerase and loss of cellular proliferative capacity." Proc Natl  
543 Acad Sci U S A **95**(22): 13097-13102.
- 544 Lombard, D. B., C. Beard, B. Johnson, R. A. Marciniak, J. Dausman, R. Bronson, J. E.  
545 Buhlmann, R. Lipman, R. Curry, A. Sharpe, R. Jaenisch and L. Guarente (2000). "Mutations in  
546 the WRN gene in mice accelerate mortality in a p53-null background." Mol Cell Biol **20**(9): 3286-  
547 3291.
- 548 Lord, C. J. and A. Ashworth (2017). "PARP inhibitors: Synthetic lethality in the clinic." Science  
549 **355**(6330): 1152-1158.
- 550 Lynch, H. T. and A. J. Krush (1971). "Cancer family "G" revisited: 1895-1970." Cancer **27**(6):  
551 1505-1511.
- 552 Mackenzie, K. J., P. Carroll, C. A. Martin, O. Murina, A. Fluteau, D. J. Simpson, N. Olova, H.  
553 Sutcliffe, J. K. Ringer, A. Leitch, R. T. Osborn, A. P. Wheeler, M. Nowotny, N. Gilbert, T.  
554 Chandra, M. A. M. Reijns and A. P. Jackson (2017). "cGAS surveillance of micronuclei links  
555 genome instability to innate immunity." Nature **548**(7668): 461-465.
- 556 Matsumoto, T., A. Shimamoto, M. Goto and Y. Furuichi (1997). "Impaired nuclear localization of  
557 defective DNA helicases in Werner's syndrome." Nat Genet **16**(4): 335-336.
- 558 McDonald, E. R., 3rd, A. de Weck, M. R. Schlabach, E. Billy, K. J. Mavrakis, G. R. Hoffman, D.  
559 Belur, D. Castelletti, E. Frias, K. Gampa, J. Golji, I. Kao, L. Li, P. Megel, T. A. Perkins, N.  
560 Ramadan, D. A. Ruddy, S. J. Silver, S. Sovath, M. Stump, O. Weber, R. Widmer, J. Yu, K. Yu, Y.  
561 Yue, D. Abramowski, E. Ackley, R. Barrett, J. Berger, J. L. Bernard, R. Billig, S. M. Brachmann,  
562 F. Buxton, R. Caothien, J. X. Caushi, F. S. Chung, M. Cortes-Cros, R. S. deBeaumont, C.  
563 Delaunay, A. Desplat, W. Duong, D. A. Dvoske, R. S. Eldridge, A. Farsidjani, F. Feng, J. Feng,  
564 D. Flemming, W. Forrester, G. G. Galli, Z. Gao, F. Gauter, V. Gibaja, K. Haas, M. Hattenberger,  
565 T. Hood, K. E. Hurov, Z. Jagani, M. Jenal, J. A. Johnson, M. D. Jones, A. Kapoor, J. Korn, J. Liu,  
566 Q. Liu, S. Liu, Y. Liu, A. T. Loo, K. J. Macchi, T. Martin, G. McAllister, A. Meyer, S. Molle, R. A.  
567 Pagliarini, T. Phadke, B. Repko, T. Schouwey, F. Shanahan, Q. Shen, C. Stamm, C. Stephan, V.  
568 M. Stucke, R. Tiedt, M. Varadarajan, K. Venkatesan, A. C. Vitari, M. Wallroth, J. Weiler, J.  
569 Zhang, C. Mickanin, V. E. Myer, J. A. Porter, A. Lai, H. Bitter, E. Lees, N. Keen, A. Kauffmann, F.

- 570 Stegmeier, F. Hofmann, T. Schmelzle and W. R. Sellers (2017). "Project DRIVE: A Compendium  
571 of Cancer Dependencies and Synthetic Lethal Relationships Uncovered by Large-Scale, Deep  
572 RNAi Screening." Cell **170**(3): 577-592 e510.
- 573 Mecklin, J. P. and H. J. Jarvinen (1991). "Tumor spectrum in cancer family syndrome (hereditary  
574 nonpolyposis colorectal cancer)." Cancer **68**(5): 1109-1112.
- 575 Medico, E., M. Russo, G. Picco, C. Cancelliere, E. Valtorta, G. Corti, M. Buscarino, C. Isella, S.  
576 Lamba, B. Martinoglio, S. Veronese, S. Siena, A. Sartore-Bianchi, M. Beccuti, M. Mottolese, M.  
577 Linnebacher, F. Cordero, F. Di Nicolantonio and A. Bardelli (2015). "The molecular landscape of  
578 colorectal cancer cell lines unveils clinically actionable kinase targets." Nat Commun **6**: 7002.
- 579 Nickoloff, J. A., D. Jones, S. H. Lee, E. A. Williamson and R. Hromas (2017). "Drugging the  
580 Cancers Addicted to DNA Repair." J Natl Cancer Inst **109**(11).
- 581 O'Brien, V. and R. Brown (2006). "Signalling cell cycle arrest and cell death through the MMR  
582 System." Carcinogenesis **27**(4): 682-692.
- 583 Overman, M. J., S. Lonardi, K. Y. M. Wong, H. J. Lenz, F. Gelsomino, M. Aglietta, M. A. Morse,  
584 E. Van Cutsem, R. McDermott, A. Hill, M. B. Sawyer, A. Hendlish, B. Neyns, M. Svrcek, R. A.  
585 Moss, J. M. Ledezne, Z. A. Cao, S. Kamble, S. Kopetz and T. Andre (2018). "Durable Clinical  
586 Benefit With Nivolumab Plus Ipilimumab in DNA Mismatch Repair-Deficient/Microsatellite  
587 Instability-High Metastatic Colorectal Cancer." J Clin Oncol **36**(8): 773-779.
- 588 Peltomaki, P., R. A. Lothe, L. A. Aaltonen, L. Pylkkanen, M. Nystrom-Lahti, R. Seruca, L. David,  
589 R. Holm, D. Ryberg, A. Haugen and et al. (1993). "Microsatellite instability is associated with  
590 tumors that characterize the hereditary non-polyposis colorectal carcinoma syndrome." Cancer  
591 Res **53**(24): 5853-5855.
- 592 Prince, P. R., M. J. Emond and R. J. Monnat, Jr. (2001). "Loss of Werner syndrome protein  
593 function promotes aberrant mitotic recombination." Genes Dev **15**(8): 933-938.
- 594 Qi, Y. (2012). Random Forest for Bioinformatics. Ensemble Machine Learning: Methods and  
595 Applications. C. Zhang and Y. Ma. Boston, MA, Springer US: 307-323.
- 596 Rosenthal, A. S., T. S. Dexheimer, G. Nguyen, O. Gileadi, A. Vindigni, A. Simeonov, A. Jadhav, I.  
597 Hickson and D. J. Maloney (2010). Discovery of ML216, a Small Molecule Inhibitor of Bloom  
598 (BLM) Helicase. Probe Reports from the NIH Molecular Libraries Program. Bethesda (MD).
- 599 Shen, J. C., M. D. Gray, J. Oshima, A. S. Kamath-Loeb, M. Fry and L. A. Loeb (1998). "Werner  
600 syndrome protein. I. DNA helicase and dna exonuclease reside on the same polypeptide." J Biol  
601 Chem **273**(51): 34139-34144.
- 602 Shi, J., E. Wang, J. P. Milazzo, Z. Wang, J. B. Kinney and C. R. Vakoc (2015). "Discovery of  
603 cancer drug targets by CRISPR-Cas9 screening of protein domains." Nat Biotechnol **33**(6): 661-  
604 667.
- 605 Siitonen, H. A., O. Kopra, H. Kaariainen, H. Haravuori, R. M. Winter, A. M. Saamanen, L.  
606 Peltonen and M. Kestila (2003). "Molecular defect of RAPADILINO syndrome expands the  
607 phenotype spectrum of RECQL diseases." Hum Mol Genet **12**(21): 2837-2844.

- 608 Streit, M., S. Gratzl, H. Stitz, A. Wernitznig, T. Zichner and C. Haslinger (2018). "Ordino: a visual  
609 analysis tool for ranking and exploring genes, cell lines, and tissue samples." [bioRxiv](#).
- 610 Van Maldergem, L., H. A. Siitonen, N. Jalkh, E. Chouery, M. De Roy, V. Delague, M. Muenke, E.  
611 W. Jabs, J. Cai, L. L. Wang, S. E. Plon, C. Fourneau, M. Kestila, Y. Gillerot, A. Megarbane and  
612 A. Verloes (2006). "Revisiting the craniosynostosis-radial ray hypoplasia association: Baller-  
613 Gerold syndrome caused by mutations in the RECQL4 gene." *J Med Genet* **43**(2): 148-152.
- 614 Yu, C. E., J. Oshima, Y. H. Fu, E. M. Wijsman, F. Hisama, R. Alisch, S. Matthews, J. Nakura, T.  
615 Miki, S. Ouais, G. M. Martin, J. Mulligan and G. D. Schellenberg (1996). "Positional cloning of  
616 the Werner's syndrome gene." *Science* **272**(5259): 258-262.
- 617

618 **Figure and Table Legends**

619 **Figure 1 – WRN is a selective dependency in MSI-H cancer cell models**

620 A – WRN shRNA activity by RSA score in pooled shRNA depletion screens from Project DRIVE  
621 (McDonald, de Weck et al. 2017). Cell lines were binned according to tumor type.

622 B – MSS/MSI-H status and WRN RSA of CRC, endometrial and gastric cancer models from  
623 Project DRIVE.

624  
625 **Figure 2 – Loss of WRN selectively impairs viability of MSI-H CRC and endometrial cancer**  
626 **cell models**

627 A – MSS and MSI-H CRC cell lines were transfected with the indicated siRNAs. Cell viability was  
628 determined 7 days after transfection and is shown relative to non-targeting control (NTC) siRNA.  
629 WRN siRNA knock-down efficacy was analyzed by immunoblotting. Protein lysates were  
630 prepared 72 h after transfection. GAPDH expression was used to monitor equal loading.

631 B – Crystal violet staining of MSS and MSI-H CRC lines treated as in panel A.

632 C – Cell viability analysis of MSS and MSI-H endometrial cell lines treated as in panel A.

633 Data information: In (A and C), data are presented as mean  $\pm$  SD of three independent  
634 experiments.

635  
636 **Figure 3 – CRISPR/Cas9-mediated knock-out of WRN confirms the selective dependency**  
637 **of MSI-H CRC models on WRN**

638 A – Schematic representation of CRISPR/Cas9 depletion assays. Cas9 expressing cells were  
639 transduced with a lentivirus encoding GFP and sgRNAs. The percentage of GFP-positive cells  
640 was determined over time by flow cytometry.

641 B – Cas9 expressing MSS or MSI-H CRC cells were transduced with a lentivirus encoding GFP  
642 and sgRNAs targeting multiple domains in WRN as indicated. The percentage of GFP-positive  
643 cells was determined 14 days post-transduction and normalized to the fraction of GFP-positive  
644 cells at the first measurement. Depletion ratios are shown relative to the positive control RPA3  
645 (n=1 experimental replicate). Domains are annotated according to PFAM entry Q14191. RQC,  
646 RecQ helicase family DNA-binding domain; HRDC, Helicase and RNase D C-terminal, HTH,  
647 helix-turn-helix motif.

648 **Figure 4 – WRN dependency in MSI-H CRC is linked to its helicase function**

649 A – Schematic representation of WRN domain structure. Location of nuclease- and ATPase-  
650 inactivating mutations in siRNA-resistant WRN (WRNr) expression constructs is indicated.

651 B – MSI-H CRC HCT 116 cells were stably transduced with FLAG-tagged wild-type or mutant  
652 forms of WRNr and monoclonal lines with similar WRNr expression levels were isolated. For  
653 WRNr wild-type, two clones with high and low transgene expression were selected to cover the  
654 expression range of WRNr variants. Anti-FLAG immunofluorescence analysis was performed to  
655 monitor homogenous expression of WRNr. Expression of WRNr wild-type and mutant forms and  
656 endogenous protein levels were determined using immunoblotting with anti-FLAG and anti-WRN  
657 antibodies. GAPDH expression was used to monitor equal loading. Scale bar, 20  $\mu$ M.

658 C – WRNr-expressing HCT 116 cells were transfected with the indicated siRNAs. Cell viability  
659 was determined 7 days after transfection and is shown relative to NTC siRNA.

660

661 **Figure 5 – WRN loss-of-function in MSI-H CRC has detrimental effects on cell division**

662 A – MSS and MSI-H CRC cell lines were transfected with the indicated siRNAs.  
663 Immunofluorescence analysis was performed 96 h after transfection to determine the fraction of  
664 cells with chromosomal bridges and micronuclei. Examples with enhanced brightness are shown  
665 as insets. LAP2B signal intensity was adjusted in a subset of samples for uniform representation.  
666 Scale bar, 10  $\mu$ m.

667 B – Statistical analysis of chromosomal bridge phenotypes observed in siRNA knock-down  
668 studies shown in panel A.

669 C – Statistical analysis of micronuclei phenotypes observed in siRNA knock-down studies shown  
670 in panel A.

671 Data information: In (B and C), data are presented as mean  $\pm$  SD of two or three independent  
672 experiments ( $n \geq 410$  cells).

673

674 **Figure 6 – Time-lapse analysis of mitosis in WRN-depleted MSS and MSI-H CRC models**

675 Mitotic live cell imaging in WRN-depleted MSS and MSI-H CRC cell lines. Cells were transfected  
676 with WRN siRNA #1. Cells were stained with Hoechst dye and were analyzed 24 h post siRNA  
677 transfection. Exemplary lagging chromosomes (arrow) and a chromatin bridge (asterisk) are  
678 designated. Duration of time-lapse is indicated in minutes. Scale bar, 5  $\mu$ M.

679

680 **Figure 7 – Loss of WRN function in MSI-H CRC causes severe chromosomal defects**

681 A – MSS and MSI-H CRC cell lines were transfected with the indicated siRNAs. Mitotic  
682 chromosome spreads were prepared 72 h after transfection and visualized by microscopy. Non-  
683 homologous radial formations are designated by arrows, breaks are labeled with asterisks.

684 B – Quantification of chromosomal defects. The status of chromosomal breaks of individual  
685 metaphase spreads was categorized into normal, 1-5 breaks or more than 5 breaks ( $n \geq 28$   
686 spreads of two independently analyzed slides). Non-homologous radial formation was counted  
687 as two breaks.

688

689 **Figure 1 – figure supplement 1 – WRN dependency correlates with MMR gene mutation**  
690 **status and MLH1 expression**

691 A – Receiver operating characteristic curve and variable importance plot for Random Forest  
692 model. Note: <gene>\_st denotes the mutational status of respective gene whereas <gene>  
693 denotes the expression of the respective gene in the variable importance plot.

694 B – MLH1 mRNA TPM and WRN RSA of cancer models from Project DRIVE. Genes involved in  
695 MMR are indicated in red font.

696 Data information: Cell line mutation and expression data were derived from the Ordino database  
697 (Streit, Gratzl et al. 2018).

698

699 **Figure 2 – figure supplement 1 – Non-transformed cells do not display WRN dependency**

700 A – WRN siRNA knock-down efficacy in endometrial carcinoma cell models was analyzed by  
701 qRT-PCR. RNA lysates were prepared 72 h after transfection. WRN mRNA expression is  
702 normalized to 18S rRNA levels ( $n=1$  experimental replicate).

703 B – Non-transformed hTERT RPE-1 and HCT 116 cells were transfected with the indicated  
704 siRNAs. Cell viability was determined 7 days after transfection and is shown relative to NTC  
705 siRNA. WRN siRNA knock-down efficacy was analyzed by immunoblotting. Protein lysates were  
706 prepared 72 h after transfection. GAPDH expression was used to monitor equal loading.

707 C – *TP53*-wild-type CRC cell lines SK-CO-1 and HCT 116 cells were transfected with the  
708 indicated siRNAs. Cell viability and WRN siRNA knock-down efficacy was analyzed as in panel B.

709 Data information: In (A), data are presented as mean  $\pm$  SD of three independent experiments, in  
710 (B and C) data are presented as mean  $\pm$  SD of two independent experiments.



711

712 **Figure 3 – figure supplement 1 – CRISPR/Cas9-mediated knock-out of WRN confirms the**  
713 **selective dependency of MSI-H CRC models on WRN**

714 Cas9-GFP expressing MSS or MSI-H CRC cells were transduced with a lentivirus encoding GFP  
715 and sgRNAs targeting multiple domains in WRN as indicated. The percentage of GFP-positive  
716 cells was determined 14 days post-transduction normalized to the fraction of GFP-positive cells  
717 at the first measurement. Depletion ratios are shown relative to the positive control the positive  
718 control RPA3 (n=1 experimental replicate). Domains are annotated according to PFAM entry  
719 Q14191. RQC, RecQ helicase family DNA-binding domain; HRDC, Helicase and RNase D C-  
720 terminal, HTH, helix-turn-helix motif.

721

722 **Figure 4 – figure supplement 1 – WRN dependency in MSI-H CRC is linked to its helicase**  
723 **function**

724 A – MSI-H CRC RKO cells were stably transduced with FLAG-tagged wild-type or mutant forms  
725 of WRNr. Anti-FLAG immunofluorescence analysis was performed to monitor homogenous  
726 expression of WRNr. Overexpression of WRNr wild-type and mutant forms compared to  
727 endogenous protein levels was determined using immunoblotting with anti-FLAG and anti-WRN  
728 antibodies. GAPDH expression was used to monitor equal loading. Scale bar, 20  $\mu$ M.

729 B – WRNr-expressing RKO cells were transfected with the indicated siRNAs. Cell viability was  
730 determined 7 days after transfection and is shown relative to NTC siRNA.

731

732 **Table 1 – MSS/MSI-H status analysis of CRC, endometrial and gastric carcinoma cell lines**

733 MSS/MSI-H status was analyzed using fluorescent PCR-based analysis of the mononucleotide  
734 microsatellite markers NR-21, BAT-26, BAT-35, NR-24 and MONO-27. Main peak sizes for the  
735 mononucleotide microsatellite markers are shown for the MSS control cell line K562 and CRC,  
736 endometrial and gastric carcinoma cell lines. Cell models were classified as MSS (blue) or MSI-  
737 H (red) according to the indicated size range classification of MSS alleles.

738 **Table 2 – Overview of cell lines used in this study**

739 Cell lines used in this study are listed with tumor type of origin, MSI/MSS status, vendor source,  
740 and STR confirmation status. Variable STR profiles are reported for ISHIKAWA cells, consistent  
741 with MSI-H status (Korch, Spillman et al. 2012).

742

743 **Table 3 – Sequences of sgRNAs used for CRISPR depletion studies**

744 Sequences of sgRNAs used for targeting WRN are listed in N- to C-terminal order according to  
745 the representation in Figure 3 and Expanded View Figure 3. Domains are annotated according  
746 to PFAM entry Q14191. RQC, RecQ helicase family DNA-binding domain; HRDC, Helicase and  
747 RNase D C-terminal, HTH, helix-turn-helix motif. Negative and positive control sgRNA  
748 sequences are also listed.

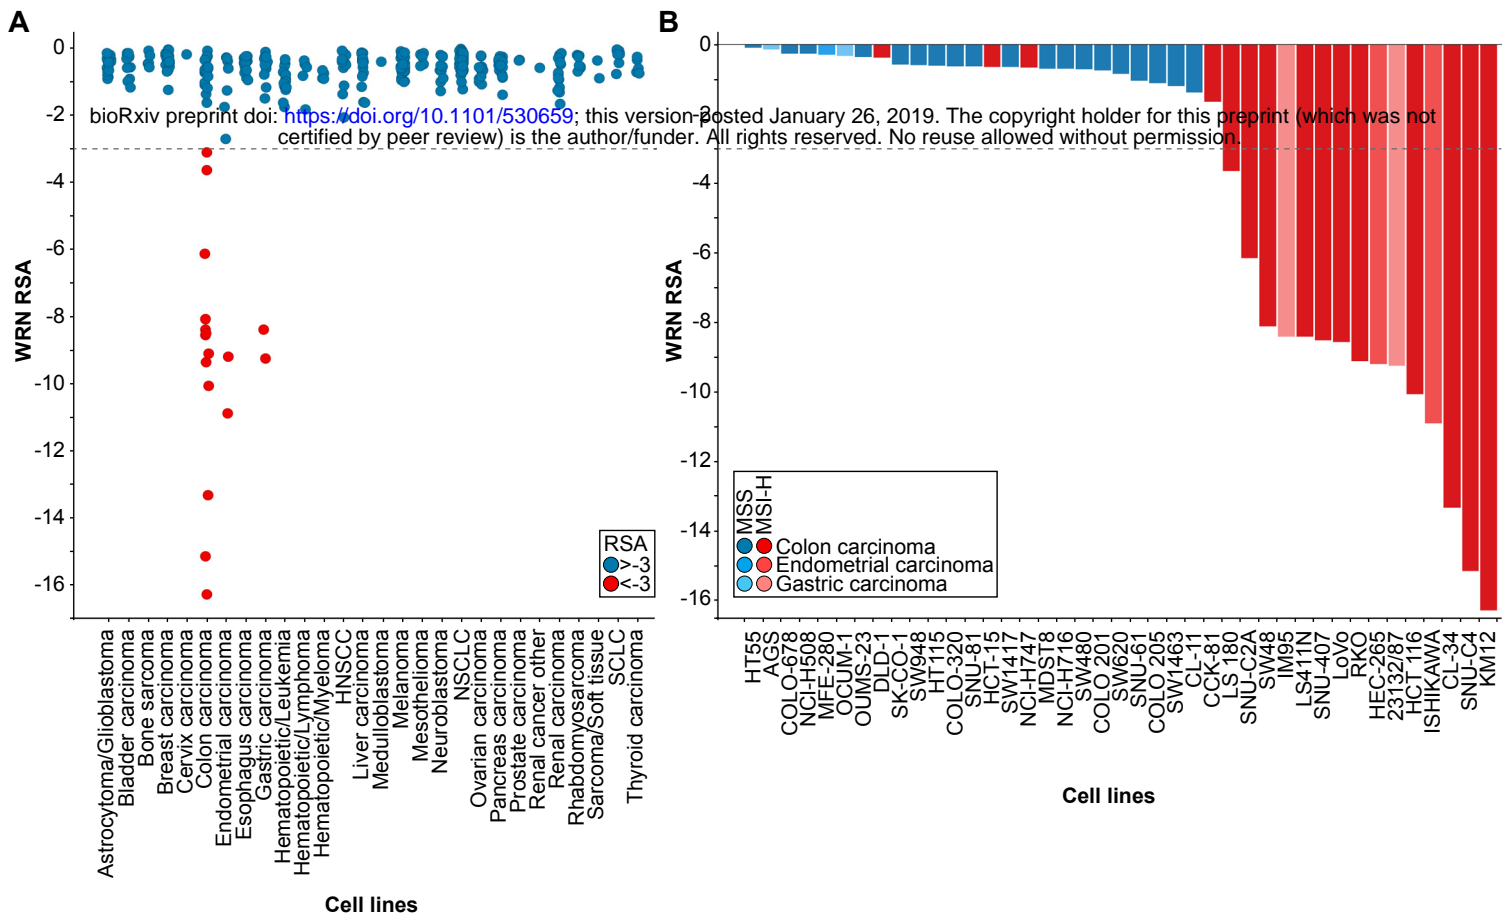

**A**

CRC cell lines

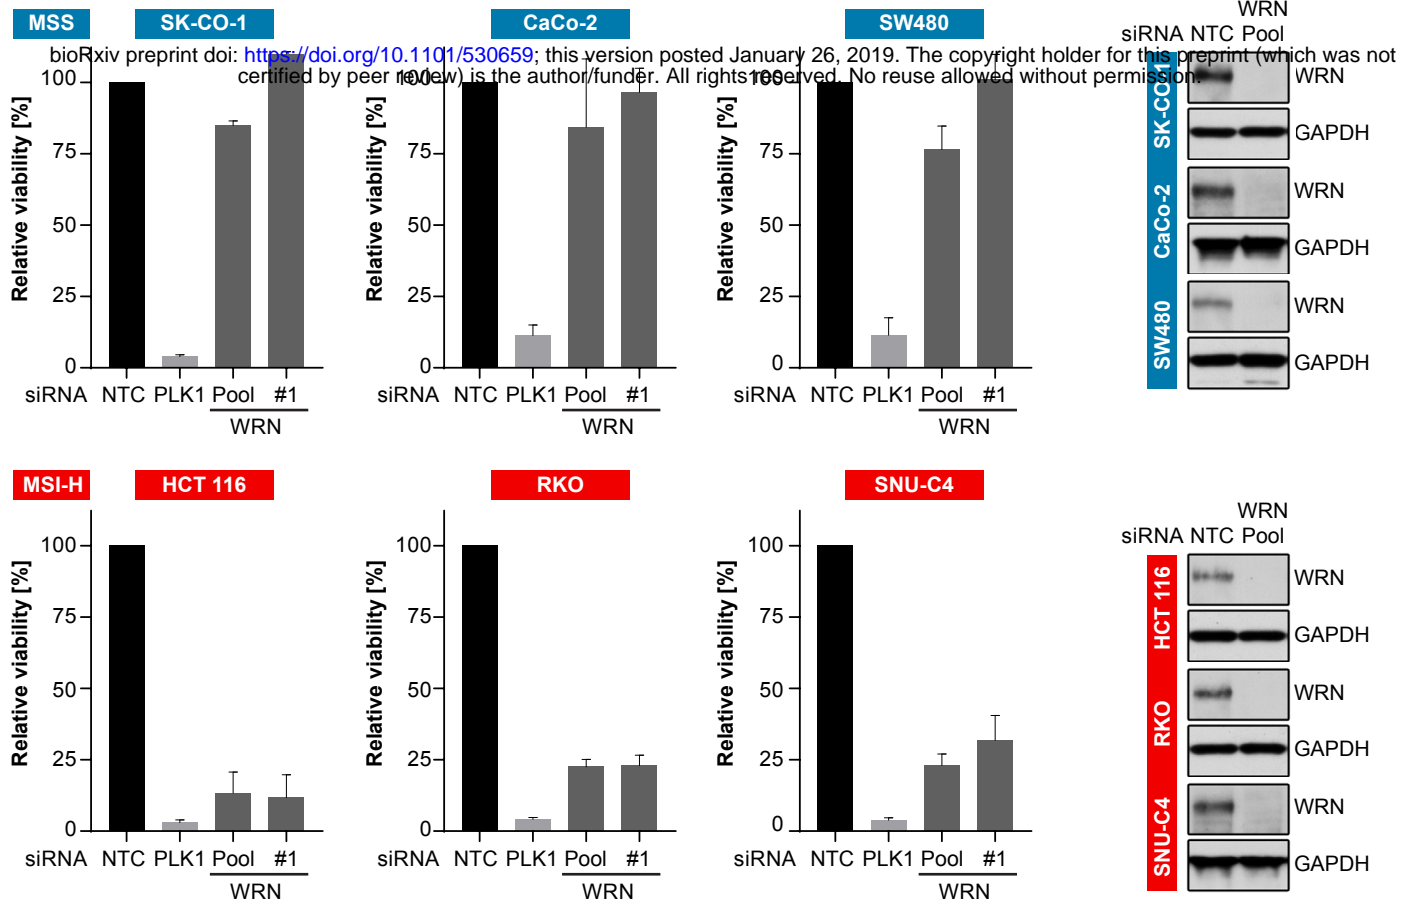**B**

CRC cell lines

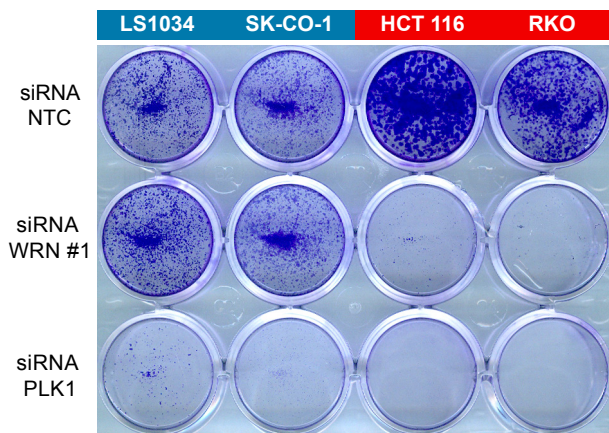**C**

Endometrial carcinoma cell lines

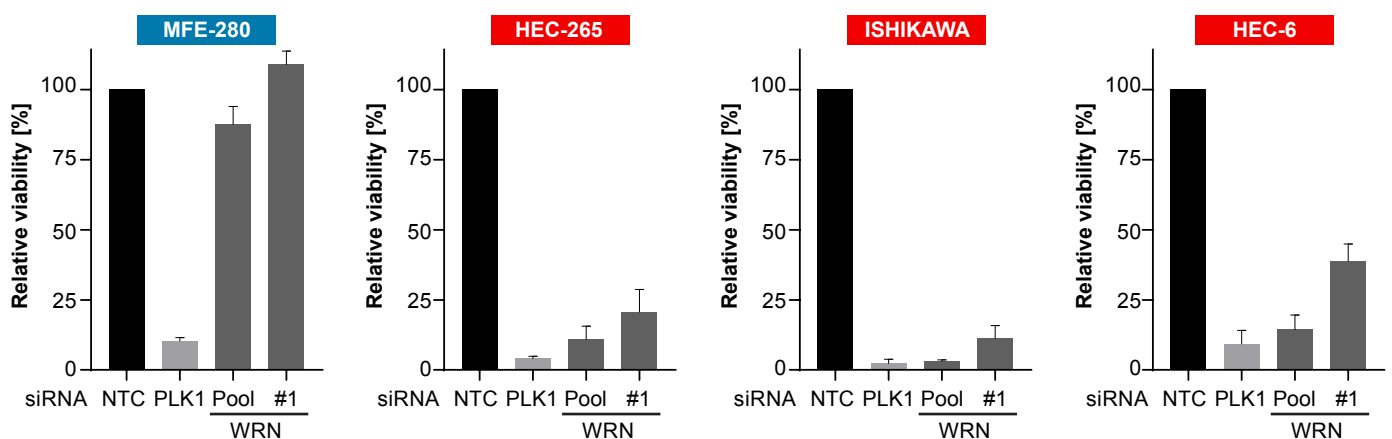

**A**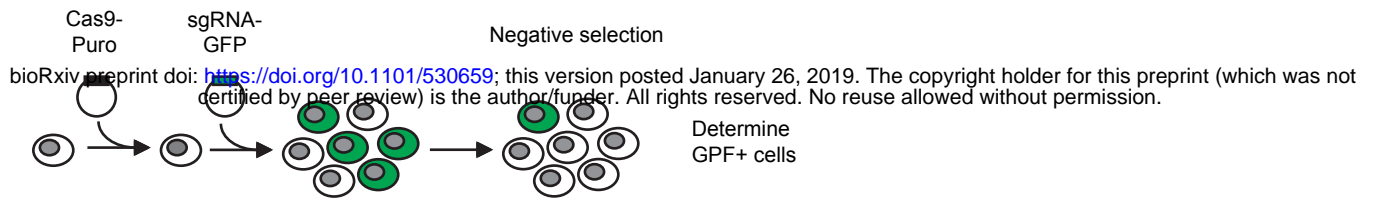**B**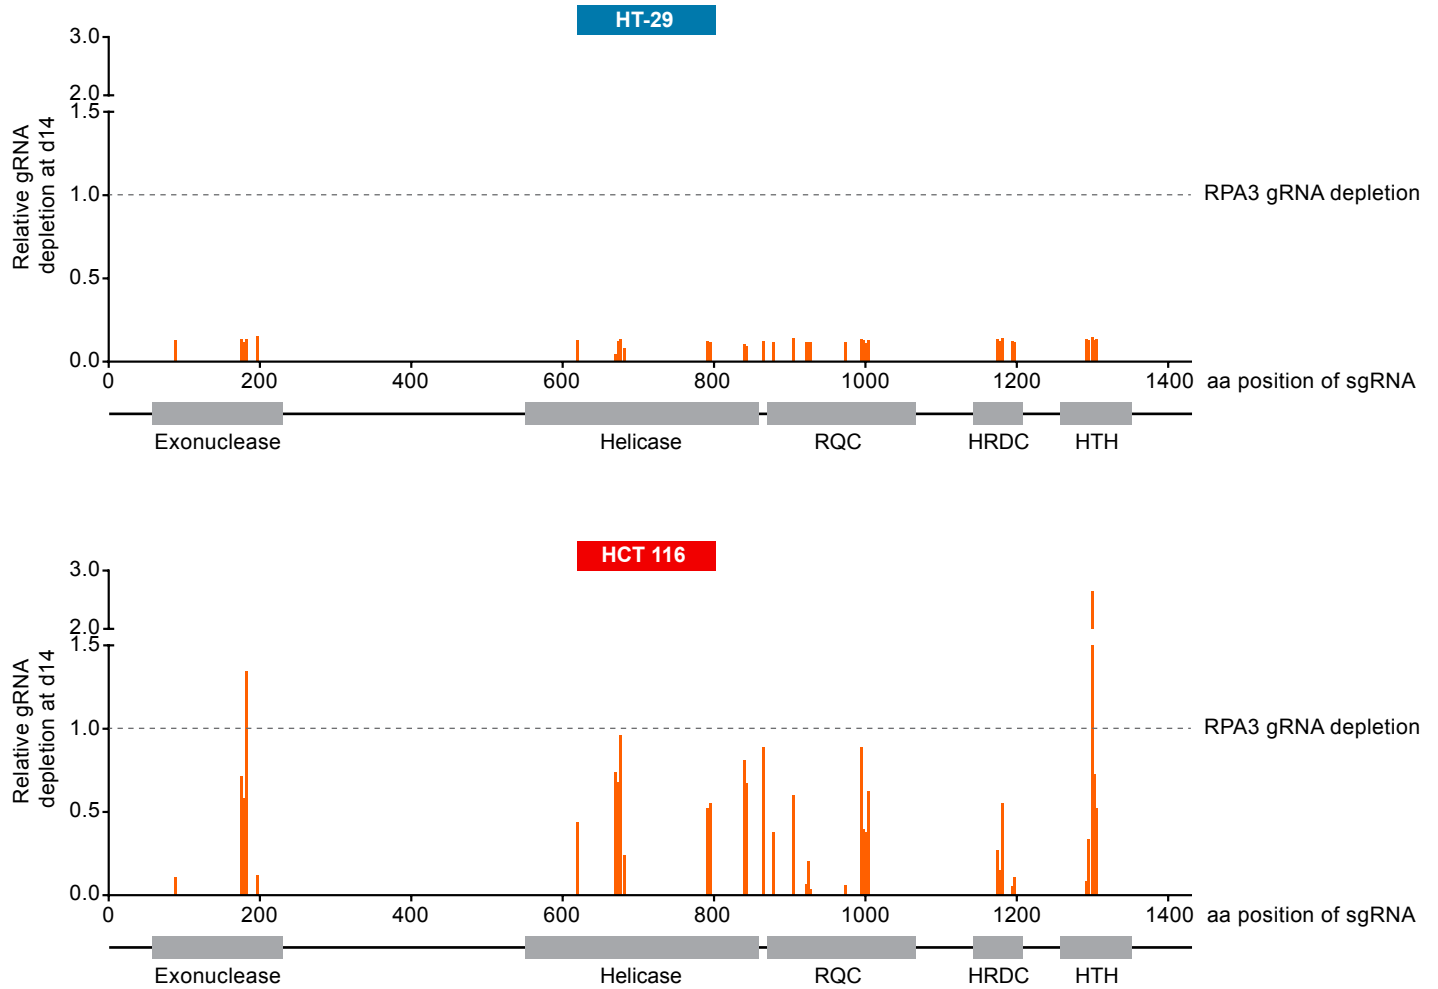

**A**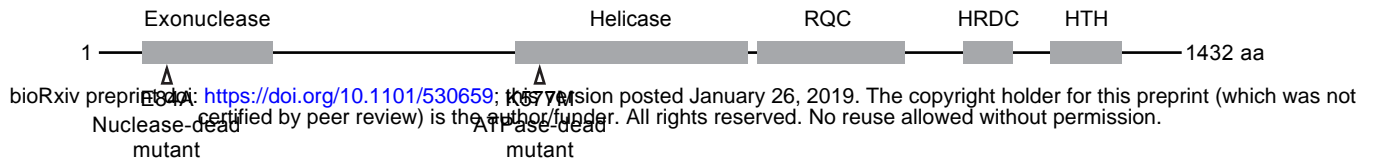**B**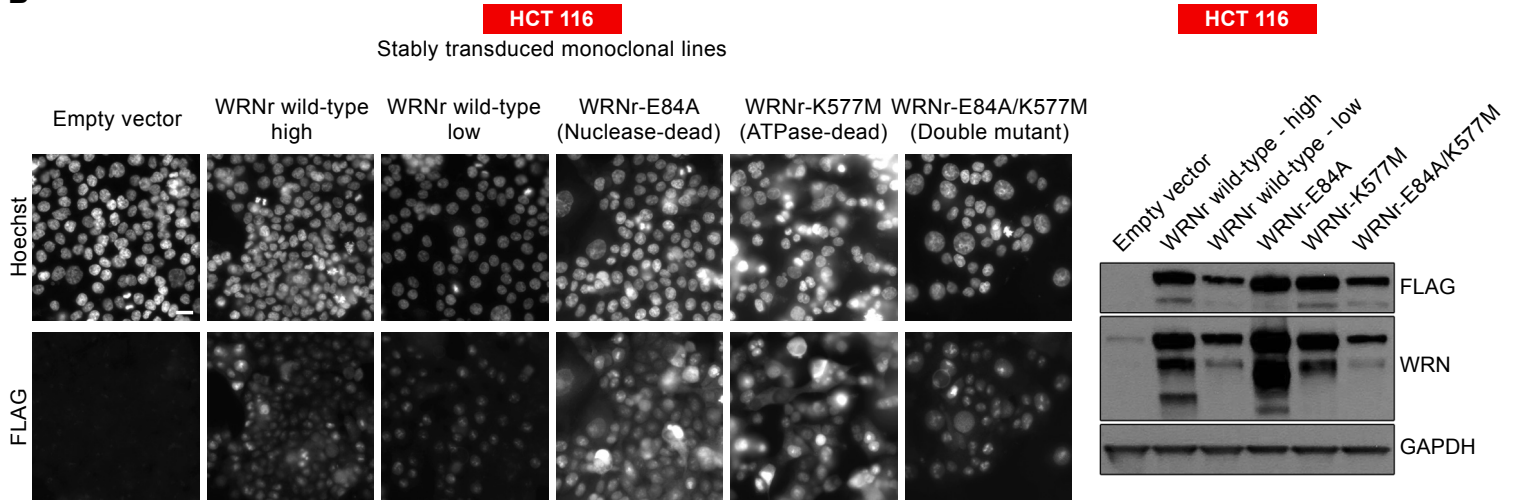**C**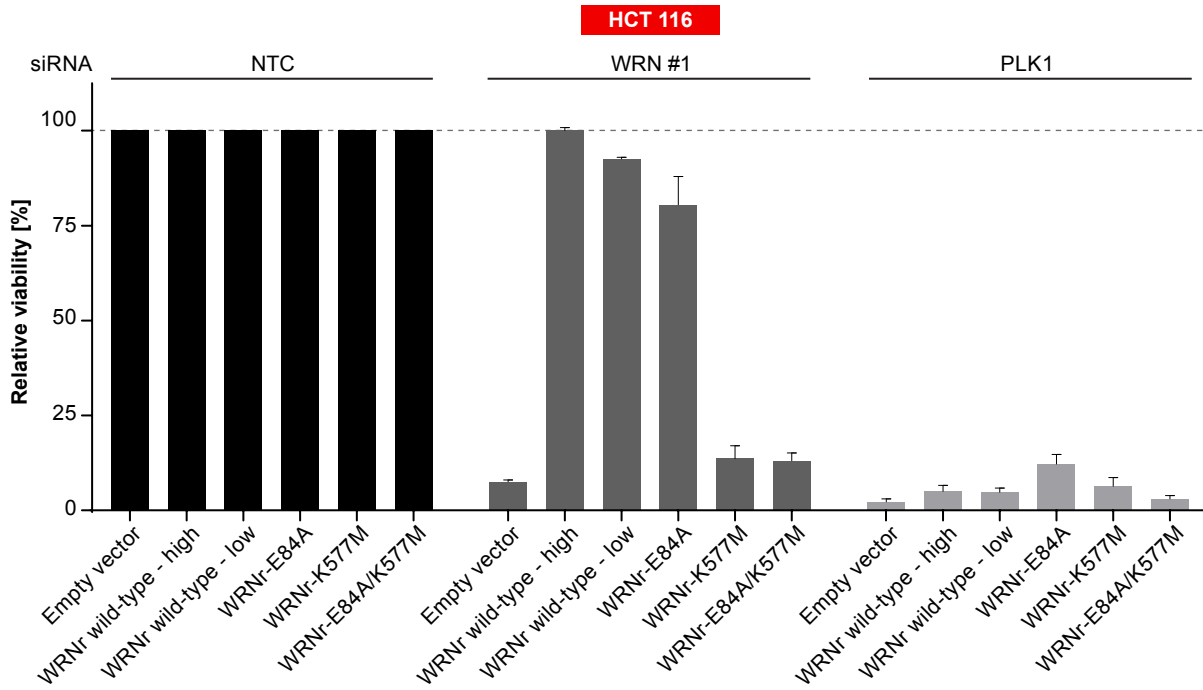

**A**

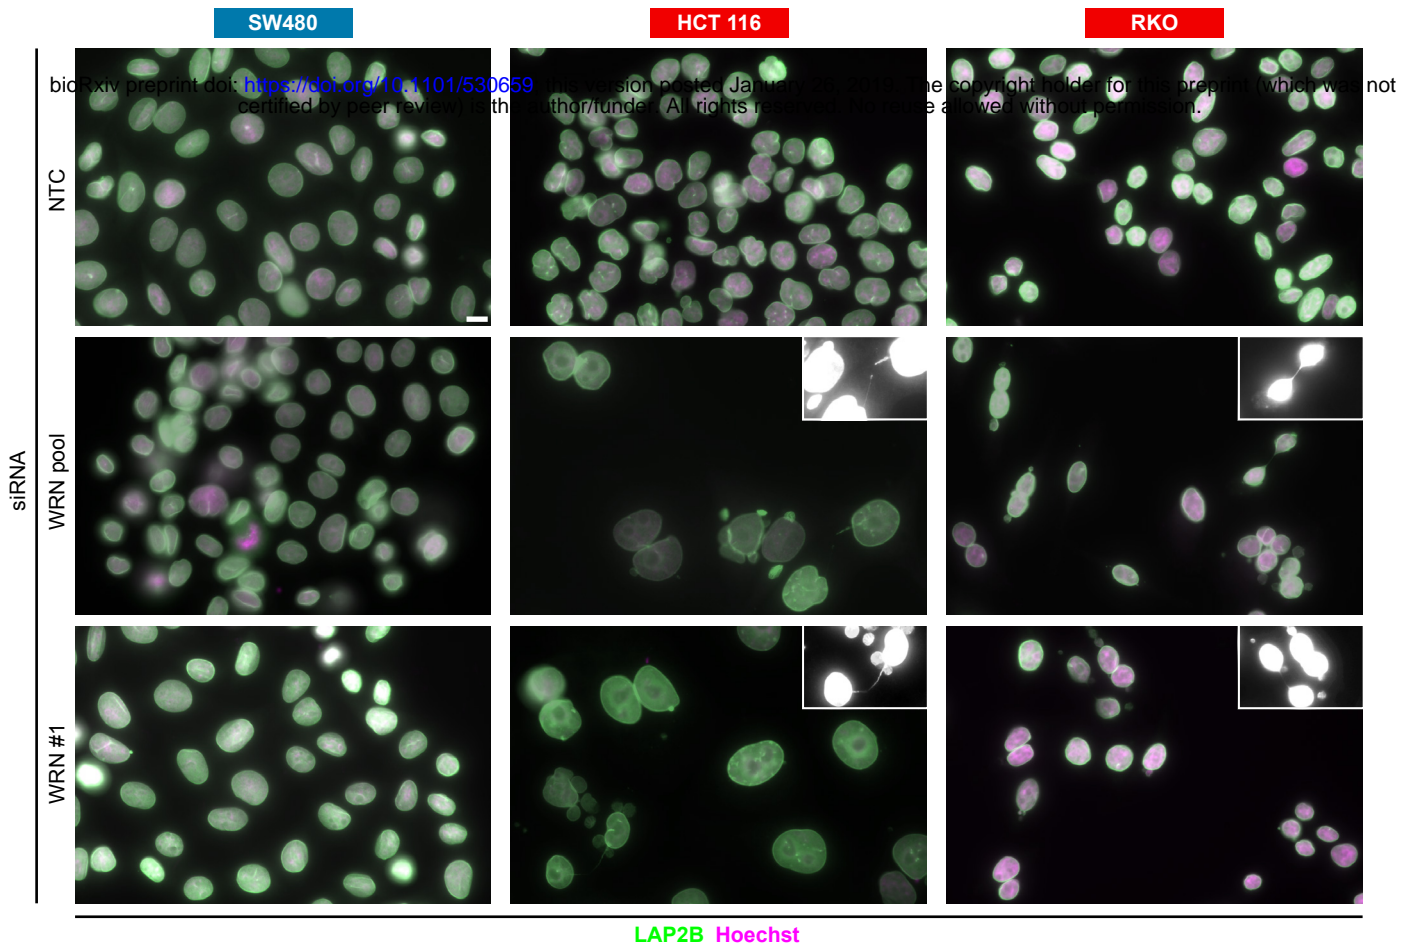

**B**

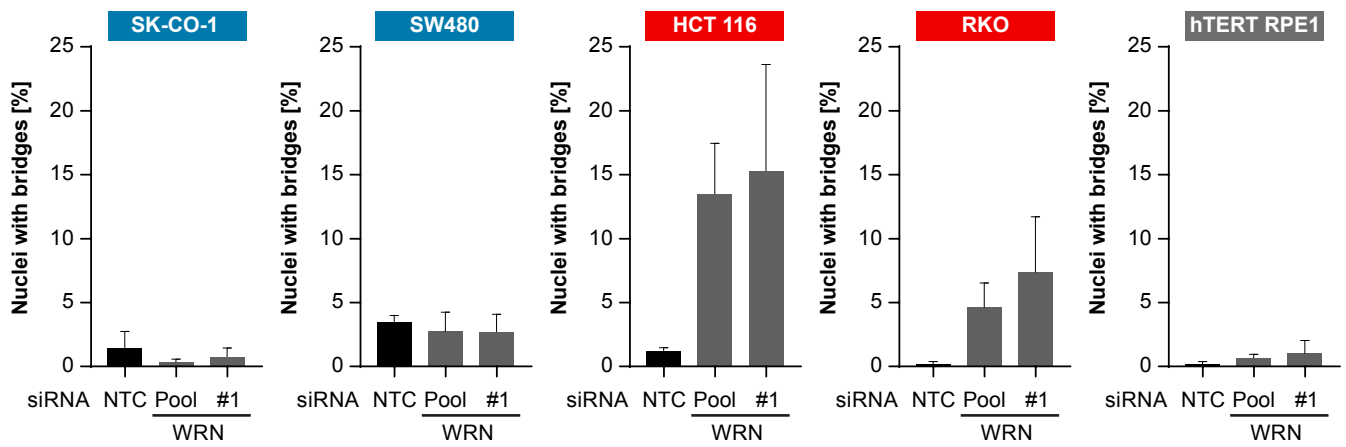

**C**

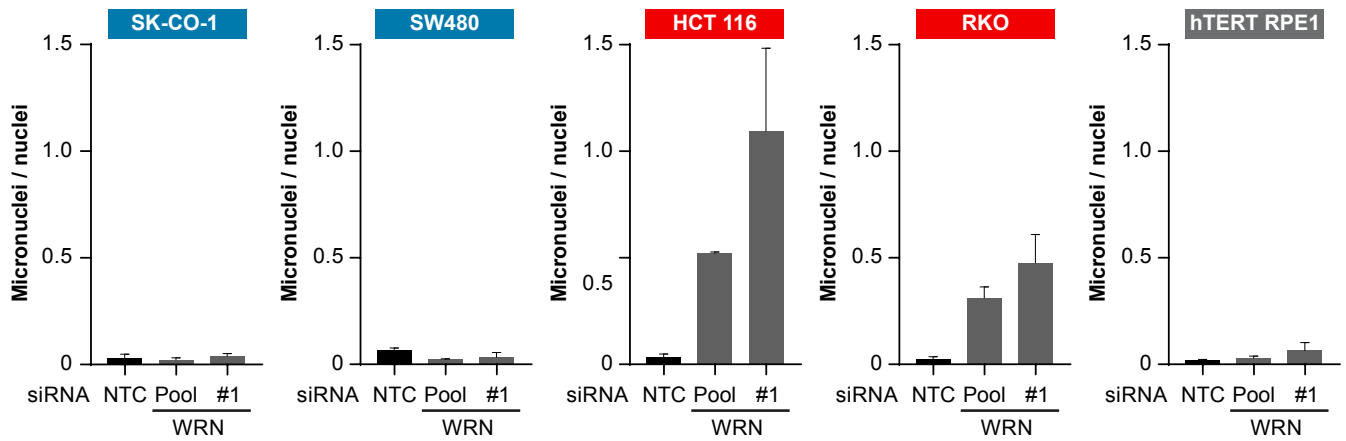

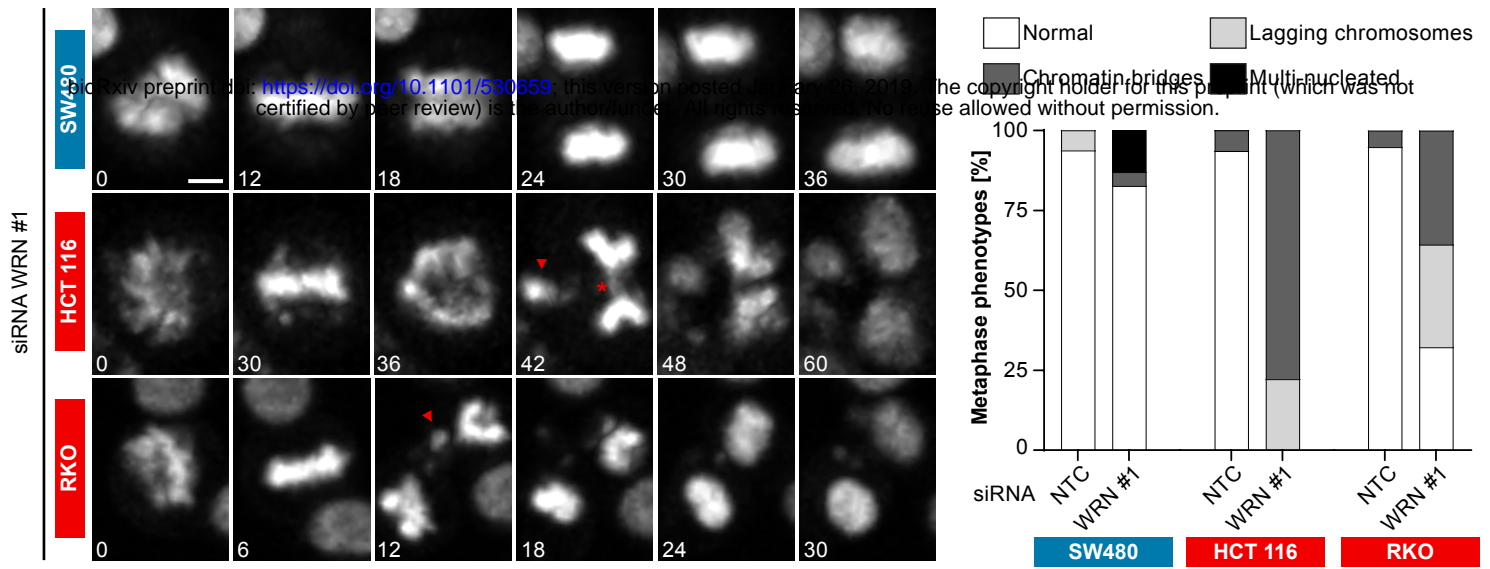



A

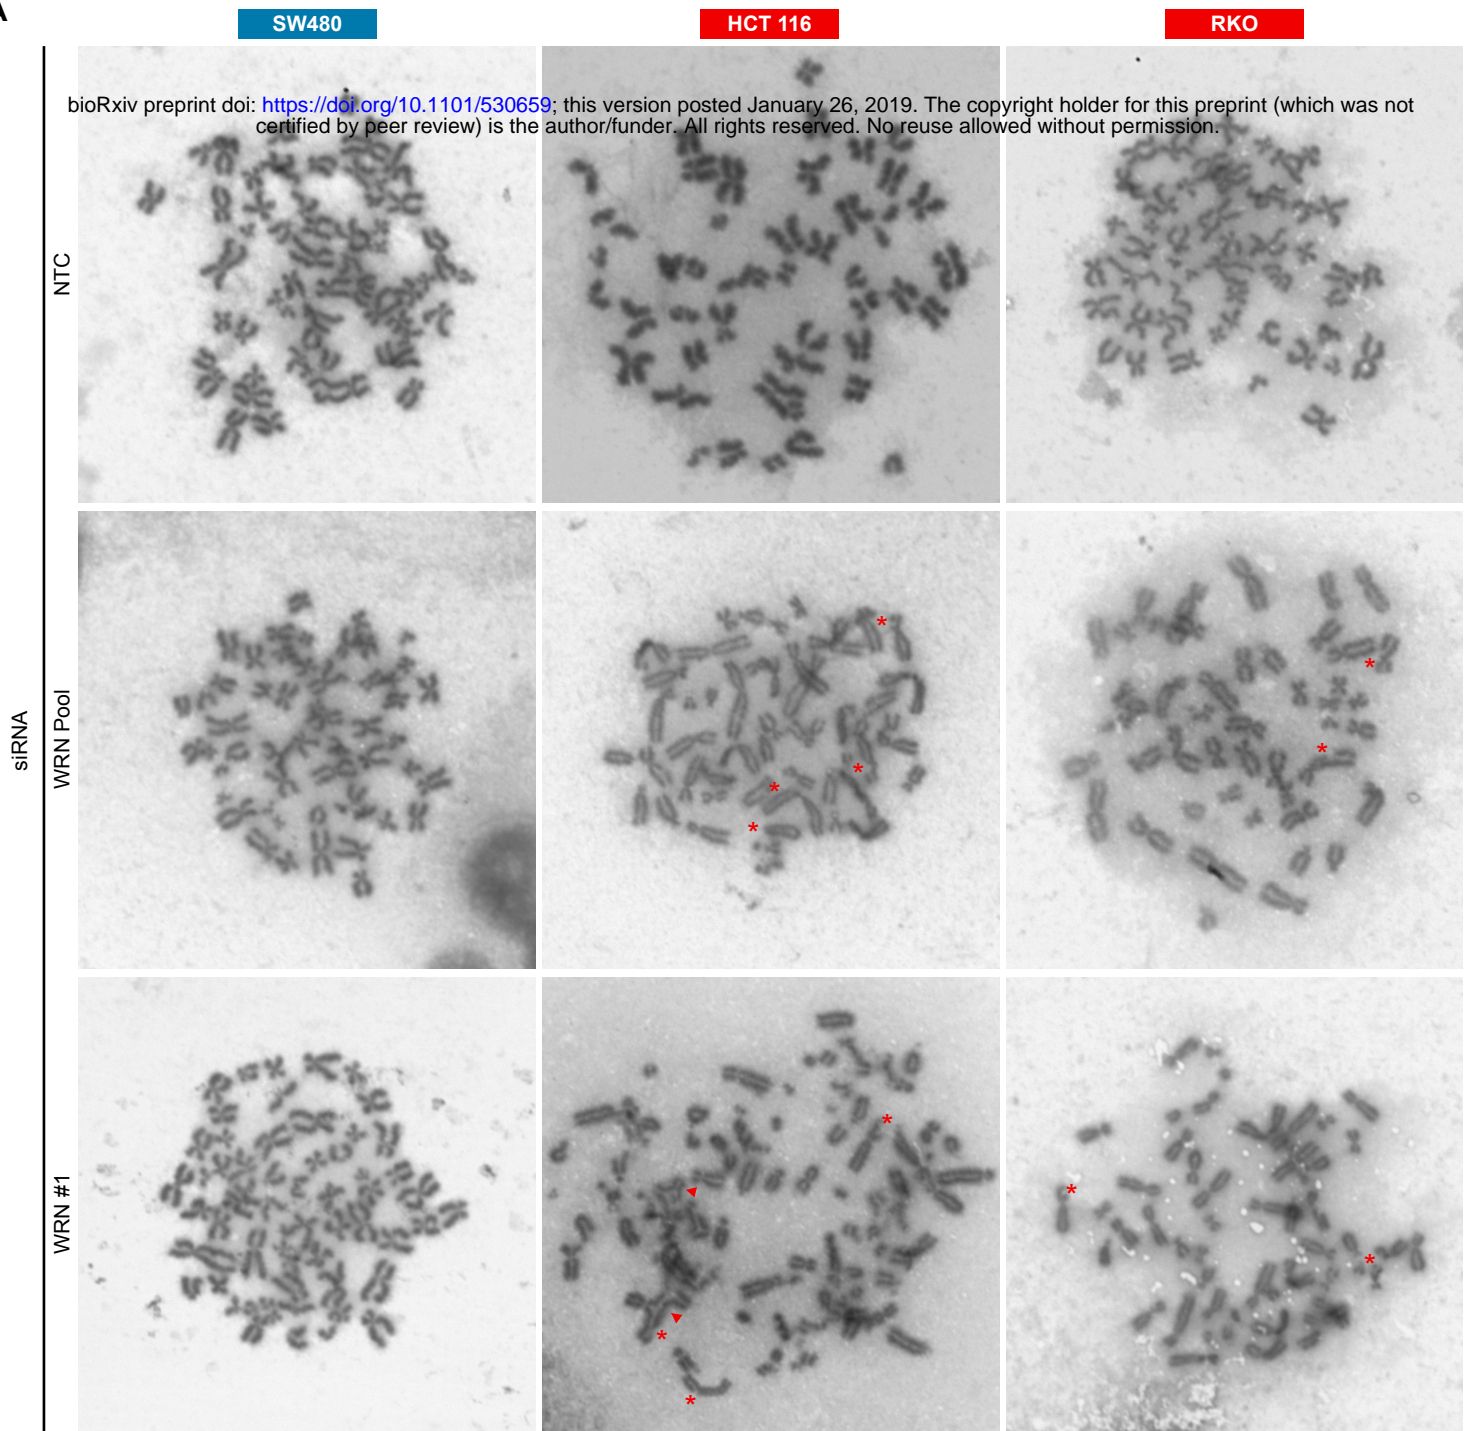

B

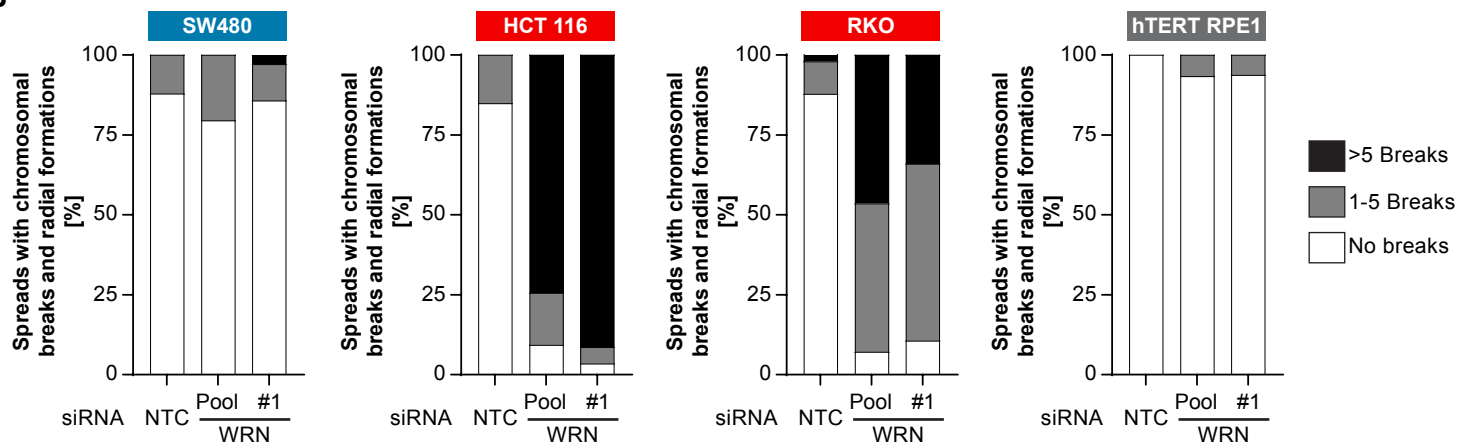

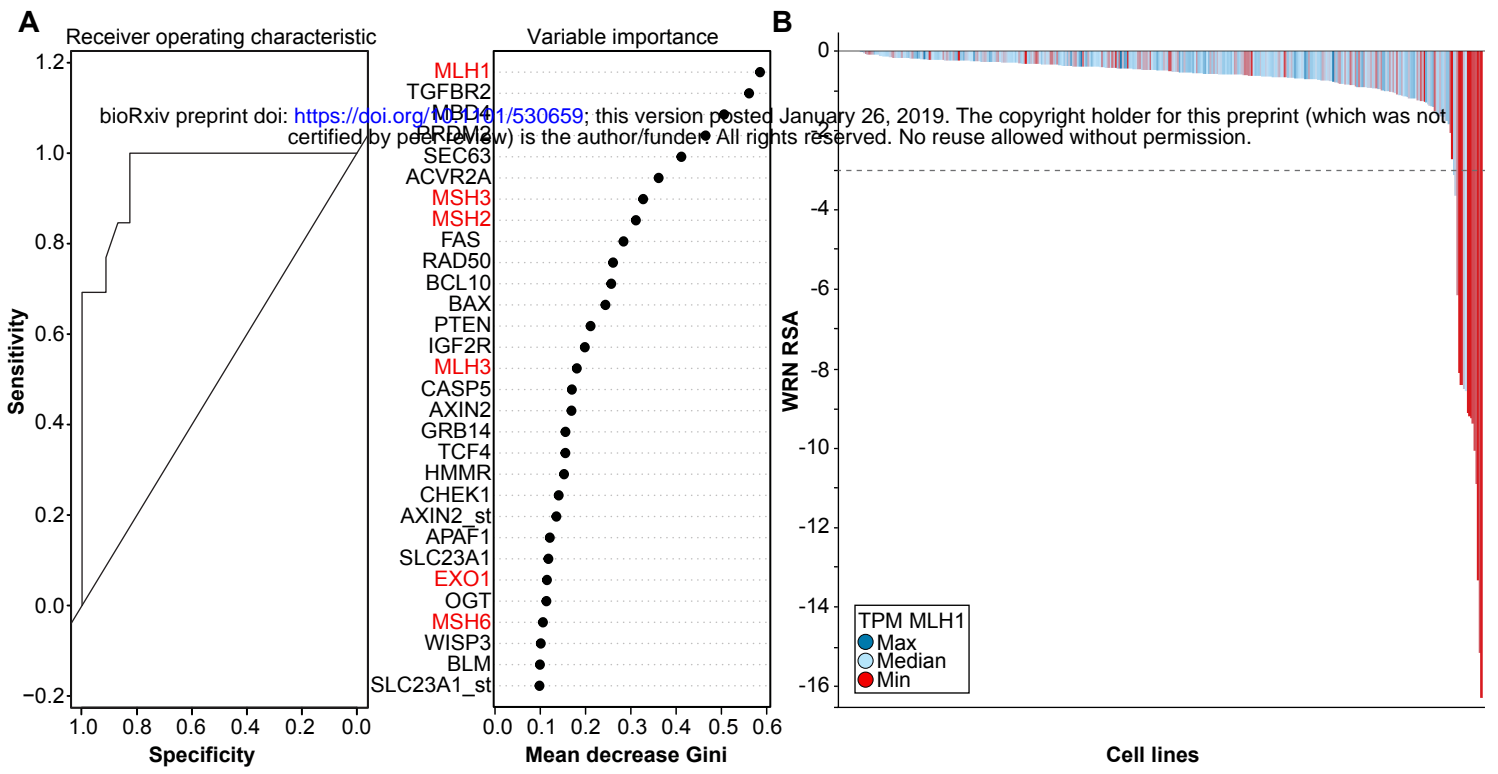

**A**

Endometrial carcinoma cell lines

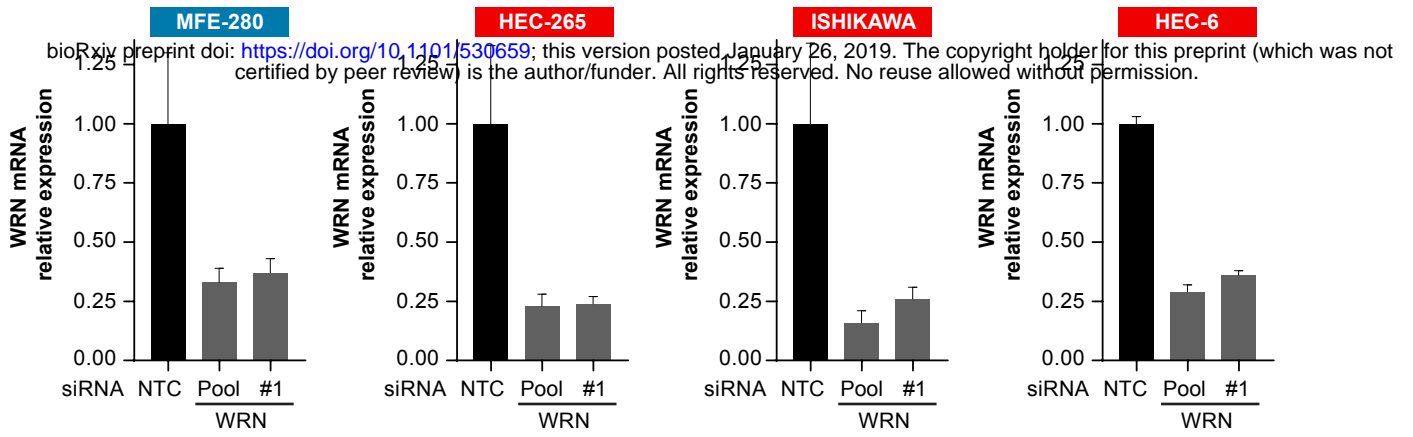

**B**

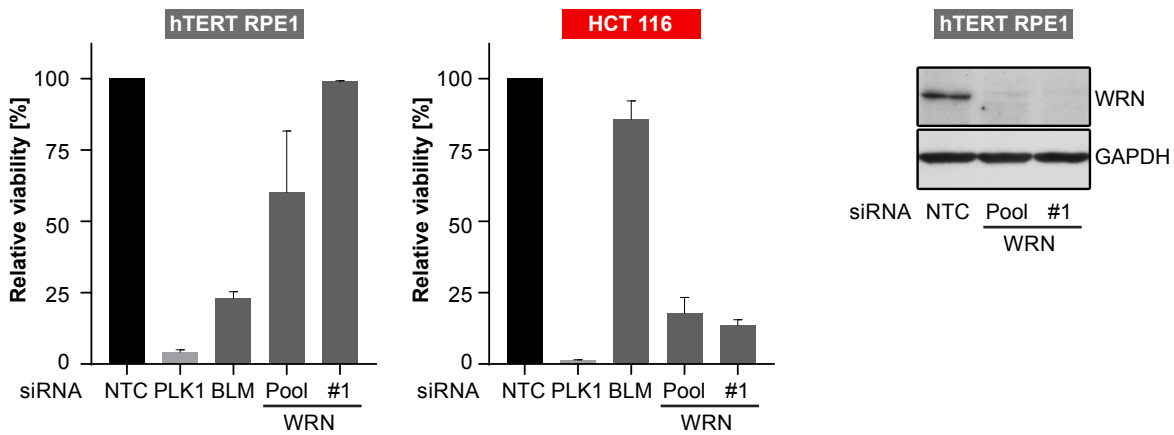

**C**

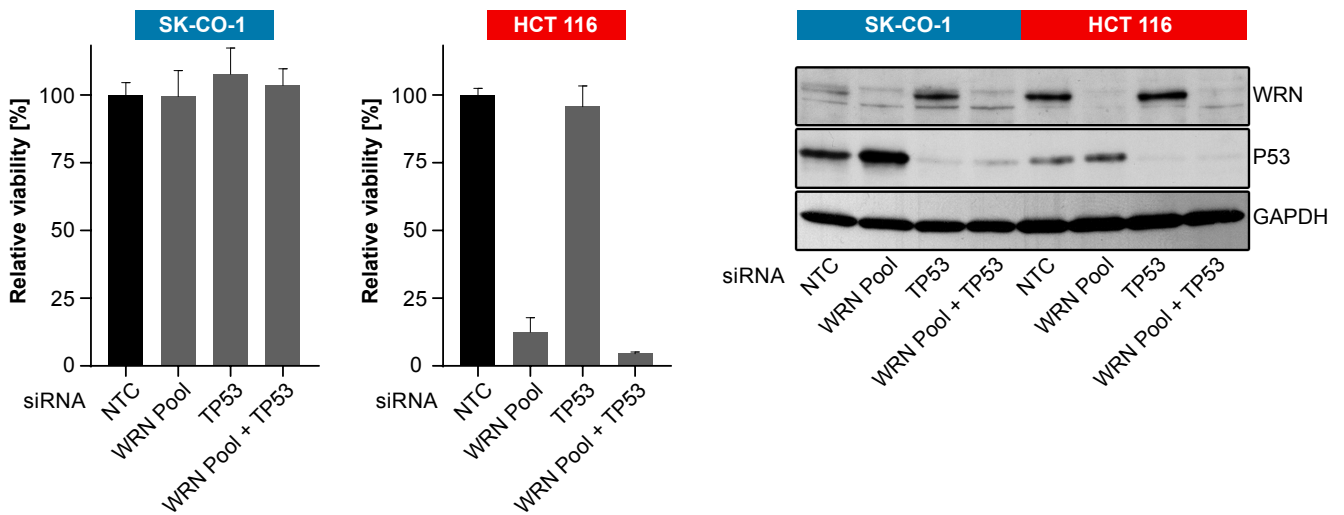

**SK-CO-1**

bioRxiv preprint doi: <https://doi.org/10.1101/530659>; this version posted January 26, 2019. The copyright holder for this preprint (which was not certified by peer review) is the author/funder. All rights reserved. No reuse allowed without permission.

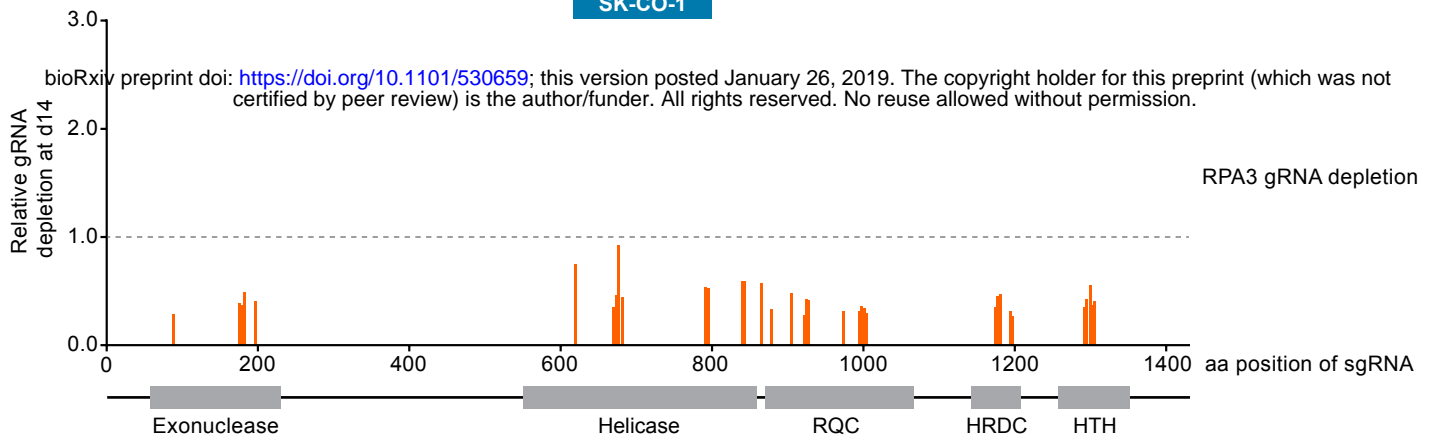**RKO**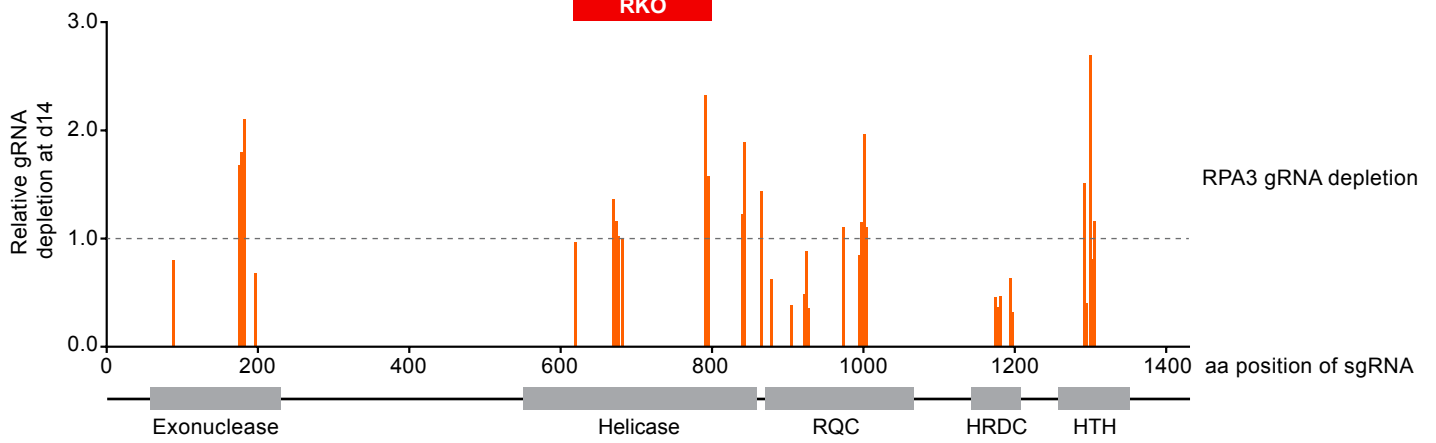

**A**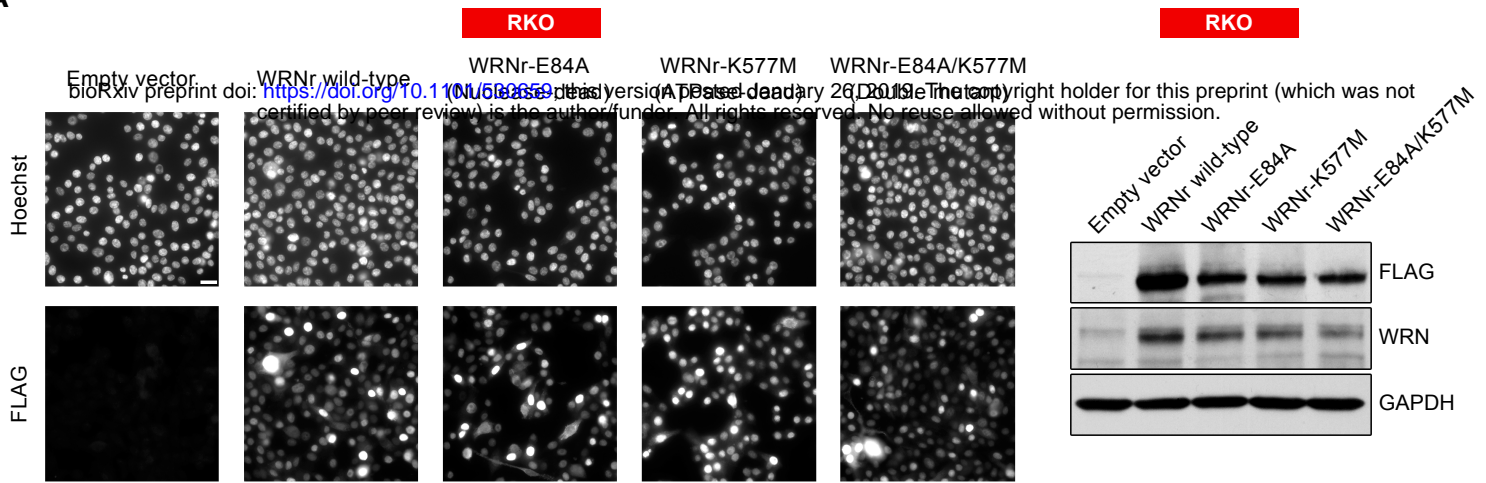**B**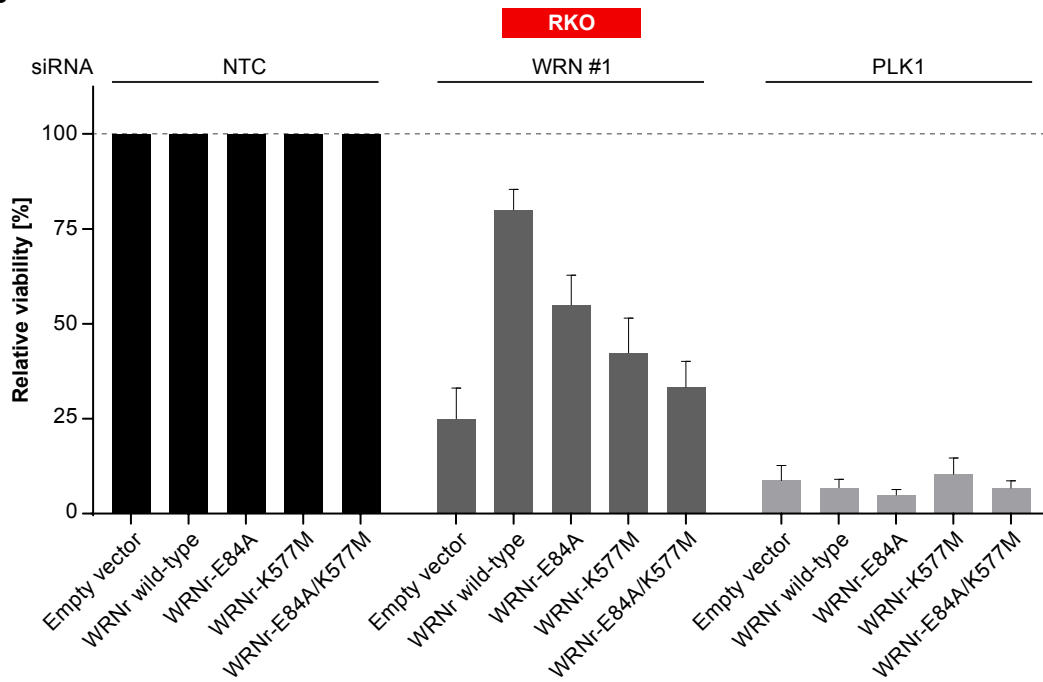

**Table 1**

|                |                 | <b>MSS control cell line</b> | <b>Normal retinal pigment epithelial cells</b> |
|----------------|-----------------|------------------------------|------------------------------------------------|
| <b>Marker</b>  | Size range (bp) | K562 (bp)                    | hTERT RPE-1 (bp)                               |
| <b>NR-21</b>   | 94-101          | 100.6                        | 100.7                                          |
| <b>BAT-26</b>  | 103-115         | 113.4                        | 114.4                                          |
| <b>BAT-25</b>  | 114-124         | 121.5                        | 121.6                                          |
| <b>NR-24</b>   | 130-133         | 130.1                        | 130.0                                          |
| <b>MONO-27</b> | 142-154         | 149.9                        | 149.0                                          |

|                | <b>CRC cell lines</b> |            |             |              |          |             |
|----------------|-----------------------|------------|-------------|--------------|----------|-------------|
| <b>Marker</b>  | SK-CO-1 (bp)          | SW480 (bp) | CaCo-2 (bp) | HCT 116 (bp) | RKO (bp) | SNU-C4 (bp) |
| <b>NR-21</b>   | 100.6                 | 99.6       | 99.7        | 92.3         | 87.0     | 90.3        |
| <b>BAT-26</b>  | 114.4                 | 113.4      | 113.5       | 101.9        | 102.7    | 101.8       |
| <b>BAT-25</b>  | 121.5                 | 120.5      | 121.8       | 115.2        | 112.1    | 114.2       |
| <b>NR-24</b>   | 130.1                 | 130.1      | 131.1       | 120.9        | 124.0    | 120.8       |
| <b>MONO-27</b> | 148.9                 | 149.9      | 149.1       | 140.7        | 137.6    | 138.7       |

|                | <b>Endometrial carcinoma cell lines</b> |              |               |            |
|----------------|-----------------------------------------|--------------|---------------|------------|
| <b>Marker</b>  | MFE-280 (bp)                            | HEC-265 (bp) | ISHIKAWA (bp) | HEC-6 (bp) |
| <b>NR-21</b>   | 99.6                                    | 91.3         | 88.1          | 89.1       |
| <b>BAT-26</b>  | 113.4                                   | 102.0        | 100.9         | 100.8      |
| <b>BAT-25</b>  | 122.6                                   | 117.4        | 113.1         | 112.0      |
| <b>NR-24</b>   | 131.1                                   | 123.9        | 123.0         | 123.0      |
| <b>MONO-27</b> | 148.9                                   | 143.8        | 140.7         | 141.7      |

|                | <b>Gastric carcinoma cell lines</b> |             |               |           |
|----------------|-------------------------------------|-------------|---------------|-----------|
| <b>Marker</b>  | AGS (bp)                            | OCUM-1 (bp) | 23132.87 (bp) | IM95 (bp) |
| <b>NR-21</b>   | 98.6                                | 99.6        | 89.2          | 94.4      |
| <b>BAT-26</b>  | 113.4                               | 113.4       | 101.9         | 101.9     |
| <b>BAT-25</b>  | 121.5                               | 121.6       | 114.2         | 114.2     |
| <b>NR-24</b>   | 131.2                               | 131.1       | 123.0         | 119.8     |
| <b>MONO-27</b> | 149.9                               | 150.0       | 143.7         | 140.7     |

**Table 2**

| Cell line                | Tumor type                              | MSI/MSS status | Reference for MSI/MSS status                                        |
|--------------------------|-----------------------------------------|----------------|---------------------------------------------------------------------|
| CaCo-2                   | CRC                                     | MSS            | Medico et al. (2015) Nat Commun 6: 7002, this study                 |
| HCT 116                  | CRC                                     | MSI-H          | Medico et al. (2015) Nat Commun 6: 7002, this study                 |
| HCT 116_CRISPR-Cas9-Puro | CRC                                     | MSI-H          | Medico et al. (2015) Nat Commun 6: 7002, this study                 |
| HEC-265                  | Endometrial carcinoma                   | MSI-H          | This study                                                          |
| HEC-6                    | Endometrial carcinoma                   | MSI-H          | This study                                                          |
| HT-29_CRISPR-Cas9-Blasti | CRC                                     | MSS            | Medico et al. (2015) Nat Commun 6: 7002 (parental line)             |
| hTERT RPE-1              | Normal retinal pigment epithelial cells | MSS            | This study                                                          |
| ISHIKAWA                 | Endometrial carcinoma                   | MSI-H          | This study                                                          |
| LS1034                   | CRC                                     | MSS            | Medico et al. (2015) Nat Commun 6: 7002                             |
| MFE-280                  | Endometrial carcinoma                   | MSS            | This study                                                          |
| RKO                      | CRC                                     | MSI-H          | Medico et al. (2015) Nat Commun 6: 7002, this study                 |
| RKO Cas9-puro            | CRC                                     | MSI-H          | Medico et al. (2015) Nat Commun 6: 7002, this study (parental line) |
| SK-CO-1                  | CRC                                     | MSS            | Medico et al. (2015) Nat Commun 6: 7002, this study                 |
| SK-CO-1 Cas9-puro        | CRC                                     | MSS            | Medico et al. (2015) Nat Commun 6: 7002, this study                 |
| SNU-C4                   | CRC                                     | MSI-H          | Medico et al. (2015) Nat Commun 6: 7002, this study                 |
| SW480                    | CRC                                     | MSS            | Medico et al. (2015) Nat Commun 6: 7002, this study                 |

| Cell line                | Source     | STR confirmed |
|--------------------------|------------|---------------|
| CaCo-2                   | ATCC       | Yes           |
| HCT 116                  | ATCC       | Yes           |
| HCT 116_CRISPR-Cas9-Puro | This study | Yes           |
| HEC-265                  | JCRB1142   | Yes           |
| HEC-6                    | JCRB 1118  | Yes           |
| HT-29_CRISPR-Cas9-Blasti | This study | Ongoing       |
| hTERT RPE-1              | ATCC       | Ongoing       |
| ISHIKAWA                 | ECACC      | No*           |
| LS1034                   | ATCC       | Yes           |
| MFE-280                  | DSMZ       | Near full     |
| RKO                      | ATCC       | Yes           |
| RKO Cas9-puro            | ATCC       | Near full     |
| SK-CO-1                  | ATCC       | Yes           |
| SK-CO-1 Cas9-puro        | ATCC       | Yes           |
| SNU-C4                   | KCLRF      | Yes           |
| SW480                    | ATCC       | Near full     |

\* variable STR profiles reported consistent with MSI-H status (Korch et al. (2012) Gynecol Oncol 27(1):241-8)

**Table 3**

| <b>WRN domain targeting sgRNAs (N- to C-terminal order)</b> |                               |
|-------------------------------------------------------------|-------------------------------|
| <b>Targeted domain</b>                                      | <b>sgRNA sequence</b>         |
| <b>Exonuclease</b>                                          | AGTCTATCCGCTGTAGCAAT          |
|                                                             | GACCTGGAGCCTTAACAGTC          |
|                                                             | AACCAGACTGTTAAGGCTCC          |
|                                                             | AGTCTGGTTAAACACCTCTT          |
|                                                             | GGCCACCATTATACAATAGA          |
| <b>Helicase</b>                                             | GCTCACTGTATTTCTGAGTG          |
|                                                             | AGGCTCACTGTATTTCTGAG          |
|                                                             | CTCACTGTATTTCTGAGTGG          |
|                                                             | ATGATTTTAGGGATTCATTC          |
|                                                             | TTTCTGACTGTGCTGATCCA          |
|                                                             | CATTCATTACGGTGCTCCTA          |
|                                                             | TTACGGTGCTCCTAAGGACA          |
|                                                             | TGCTAAAACATGCCCCGCA           |
|                                                             | GCCCCATGGTATGTTCCAC           |
|                                                             | AAGTTCTTGTCACGTCTCT           |
|                                                             | CATTACGTATCTCAGTAAGA          |
|                                                             | AGTCCCATAATCCCAAGG            |
|                                                             | AAAGCCTCCTGGGAATTAT           |
|                                                             | ACAAGTACAAAAGCCTCCT           |
| ATCTTCATTCTAGCAGATGT                                        |                               |
| <b>RQC</b>                                                  | GTCTTGCCGATCAATATCGC          |
|                                                             | ACTGTGCCTGCGATATTGAT          |
|                                                             | GACATCTTAGGCGAAAATT           |
|                                                             | AGGCACAGTTTATTTGGCAC          |
|                                                             | TATCGCAGGCACAGTTTATT          |
| <b>HRDC</b>                                                 | CTACGGTTGAAAACGTAAAA          |
|                                                             | TTTACGTTTTCAACCGTAGT          |
|                                                             | GTTTGTTGCCAGAATAGCTG          |
|                                                             | TCTGGCAACAACAAGATAC           |
|                                                             | TTTGTTGCCAGAATAGCTGG          |
| <b>HTH</b>                                                  | CCCCTTGATTTGGAGCGAGC          |
|                                                             | TTATCCAAGCGGTGAAAGC           |
|                                                             | GGCAGCCAGCTTTCACCGCT          |
|                                                             | GGCCTGCTCGCTCCAAATCA          |
|                                                             | CTGCTCGCTCCAAATCAAGG          |
| <b>Control sgRNAs</b>                                       | <b>sgRNA sequence</b>         |
| Neg#1                                                       | GGCAGTCGTTCCGGTTGATAT         |
| Neg#2                                                       | GATACACGAAGCATCACTAG          |
| RPA3                                                        | GATGAATTGAGCTAGCATGC          |
| PCNA                                                        | GGA CT CGT CCC AC G T CT CT T |
| POLR2A                                                      | GTACAATGCAGACTTTGACG          |
